# Supplementary material
Source: publisher figshare collection journal article supplement (https://geolsoc.figshare.com/ndownloader/files/26836814)
Supplement: Supplementary file 1 [file 26836814]

## Sheet: Takahe1.Spectra.Summary
Summary of 40Ar/39Ar results
									Preferred Age							Isochron Age									Integrated Age
Sample	Unit	Location	L#	Irrad	min	analysis	n	%39Ar	MSWD	K/Ca	±	2s	Age(ka)	±	2s	40Ar/36Ar	±	2s	Age(Ma)	±	2s		n	MSWD	K/Ca	±	2s	Age(Ma)	±	2s		Comments
MTK98-017		Gill Bluff	50358-01	NM-108	anorth, 45 mg	Plateau	2	30.3712	0.29	3	±	0	21.507	±	3.29527	321.7	±	105.6	19.3074	±	9.57682		11		3.17479			60.9436	±	2.66336
MTK98-24		Gill Bluff	50361-03	NM-108	anorthoclase, 3 holes, 35.77	Plateau	7	96.8019	2.67	4.1	±	0.5	21.9538	±	3.6993	297.2	±	16.4	21.3324	±	5.23855		9		4.04864			25.0066	±	2.75713
MTK98-027		Gill Bluff	50362-01	NM-108	anorthoclase, 36.26 mg	Plateau	3	55.4994	1.74	4.3	±	0.5	20.1865	±	3.6731	290.2	±	14.3	22.2315	±	5.8936		8		4.17443			49.9315	±	3.6678
MTK98-039		Gill Bluff	50378-01	NM-108	anorth, 37.1 mg	Plateau	2	49.4332	3.51	3.35	±	0.183	25.9527	±	5.13114	410.9	±	24.4	9.34858	±	2.09923		8		3.40701			40.5996	±	2.84886
MTK98-055		Staufer Bluff	50368-01	NM-108	gmass hawaiite, 220.15	Plateau	6	79.4478	0.2	0.26	±	0.19	69.4865	±	9.60751	297.8	±	1.7	61.0122	±	13.0253		9		0.216708			139.284	±	89.2678
MTK98-058		Staufer Bluff	50372-01	NM-108	gmass hawaiite, 199.99 MG	Plateau	7	99.1511	2.99	0.31	±	0.28	61.3355	±	10.489	293.5	±	4.1	67.0352	±	11.6989		8		0.187194			59.6015	±	13.2865
MTK98-064		Staufer Bluff	50373-01	NM-108	gmass hawaiite, 200.36 MG	Plateau	6	70.0345	0.98	0.27	±	0.3	56.7367	±	19.3923	296.7	±	2	54.5409	±	20.845		9		0.197966			89.9882	±	114.112
MTK98-100		upper Moll Spur	50363-01	NM-108	anorthoclase, 3 holes, 51.44	Plateau	2	36.1501	16.1	2.84	±	0.094	19.6909	±	12.1393	477	±	36.8	-15.8313	±	2.64136		9		2.93231			39.9612	±	2.35466
MTK98-100		upper Moll Spur	50363-05	NM-108	anorthoclase, 15.8 mg	Plateau	3	99.6843	0.48	2.7	±	0.1	22.849	±	3.13253	276.8	±	37.9	34.0216	±	18.5663		4		2.64979			27.1375	±	4.87308
MTK98-100		upper Moll Spur	50363-06	NM-108	anorthoclase, 18.1 mg	Plateau	2	54.8231	0	2.538	±	0.084	17.7468	±	3.93997	612.1	±	98.7	-82.3554	±	34.8295		4		2.56222			39.5789	±	4.0533
MTK98-100		upper Moll Spur	50363-07	NM-108	anorthoclase, 18.9 mg	Plateau	2	52.3401	6.46	2.635	±	0.284	19.9638	±	14.6604	217.6	±	33.8	58.9924	±	13.4108		4		2.68255			28.0654	±	4.91325
MTK98-103		upper Moll Spur	50377-01	NM-108	anorth, 39.2 mg	Plateau	4	58.7747	0.93	3.1	±	0.3	16.4073	±	2.76333	302.1	±	31.8	15.9626	±	6.26464		6		2.95755			25.1256	±	2.18778
MTK98-110		lower Moll Spur	50389-01	NM-108	anorthoclase, 33.01 mg	Plateau	2	51.6104	10.79	2.541	±	0.056	40.6809	±	10.7156	1223.2	±	276.3	-38.848	±	17.8084		8		2.54825			81.8684	±	3.8146
MTK98-113		lower Moll Spur	50365-01	NM-108	anorthoclase 163.85 mg	Plateau	2	58.3302	110.65	2.976	±	0.063	34.2948	±	13.6772	517.4	±	5.6	-31.263	±	1.08029		12		2.9458			97.3678	±	2.38311
MTK98-113		lower Moll Spur	50365-02	NM-108	anorthoclase, 16.7 mg	Plateau	6	100	1.81	2.8	±	0.2	36.28	±	9.15745				no isochron				6		2.839			35.7164	±	6.9428
MTK98-113		lower Moll Spur	50365-04	NM-108	anorthoclase, 34.05 mg	Plateau	3	59.6862	0.52	2.8	±	0.1	37.5937	±	3.9603	309	±	36.7	34.1054	±	10.2319		7		2.75752			101.534	±	3.60033
MTK98-115		lower Moll Spur	50376-01	NM-108	anorthoclase, 45.22 mg	Plateau	2	43.1037	5.9	2.63	±	0.009	28.3918	±	7.45775	1177.5	±	223.6	-42.6253	±	15.1316		8		2.70741			70.7875	±	3.01645
MTK98-090		Cadenazzi	50387-01	NM-108	gmass hawaiite, 172.9 MG	Plateau	3	43.1733	0.49	1.478	±	0.651	89.1455	±	4.13736	1579.7	±	12.8	-1635.62	±	18.3512		9		0.41399			1498.9	±	0.0152613		extreme excess 40Ar in hi-temp steps
MTK-98083		Roper Point	51410-01	NM-120	Bulk san; 146mg	Plateau	5	62.4356	1.35	1.8	±	0.4	113.104	±	2.11646	328.1	±	29	111.8	±	2.25567		10		1.78589			117.757	±	2.89858		Roper Point lapilli
MTK-98086		Roper Point	51411-01	NM-126	San, 128mg	Plateau	6	62.0523	1.82	6.2	±	3.1	137.698	±	3.00578	292	±	3.7	141.3	±	4.39095		10		6.92389			139.879	±	3.33258		Roper Point fine ash
MTK-98087		Roper Point	51407-01	NM-126	san, 67 mg	Plateau	10	98.7635	24.58	4.668	±	4.097	193.917	±	9.50501	293.3	±	2.3	195.196	±	2.11724		11		4.21639			187.079	±	6.18028		Roper Point lapilli
MTK-98117		Moll Spur	51409-01	NM-126	San, 139.8mg	Plateau	4	50.6213	6.22	12.16	±	1.399	3.37887	±	2.82657	311	±	2.9	0.572517	±	0.100744		10		12.2019			11.46	±	2.27559		Moll Spur lapilli
MTK-98121		Moll Spur	51408-01	NM-126	San, 85mg	Plateau	8	95.5809	6.69	13.9	±	3.6	1.85162	±	2.71832	288.4	±	10.2	3.81574	±	1.02513		10		13.7016			4.39645	±	1.43059		Moll Spur lapilli

## Sheet: Takahe1.Spectra
Table 1. 40Ar/39Ar analytical data.
	ID	Power	40Ar/39Ar	38Ar/39Ar	37Ar/39Ar	36Ar/39Ar	39ArK	K/Ca	Cl/K	40Ar*	39Ar	Age	±1s	Dur Heating At Req Pwr	Comment	Irrad.	Ar40_Disc	Ar40_DiscEr	Ar36_ICFactor	Ar36_ICFactorEr		Run_ID	Sample	System	Run_Date	Run_Hour	Run_SecSince1904	PrincipalInvestigator	Material	Hole #	Project	Locality	File	Version	History	Comment	Fit_Type	Signal Norm.	Run Script	Fract_Deliv_To_MS	Heating_Dev	Pwr_Requested	Pwr_Achieved	Pwr_AchievedSD	Pwr_AchievedMax	OP_Temp	Tot_Dur_Heating	Dur_Heating_At_Req_Pwr	Holes
		(Watts)				(x 10-3)	(x 10-15 mol)			(%)	(%)	(ka)	(ka)
	MTK98-017, B2:108, anorth, 45 mg, J=0.000118±0.10%, D=1.00531±0.00097, nm-108, Lab#=50358-01, MAP
Xi	C	4	35.4475	-0.007888	0.144735	112.088	0.0506771	3.52509	-0.0109711	6.58826	0.0939795	497	384.163	1394	Unknown; Automated laser analysis ; 600/200	nm-108	1.00531	0.00097	1	0		50358-01C	MTK98-017, B2:108	3	1999-08-04	5.15694	3016588000	TW	anorth, 45 mg	0	Takahe		Macintosh HD:Users:mcintosh:Documents: Atlas Wilch 2019: MBL MS Data:Takahe:MS Data Takahe iso all:MS Lookup Table	7.875	Bs Mult = L; Ar 40 = L; Ar 39 = L; Ar 38 = L; Ar 37 = L; Ar 36 = L @ ---	Unknown; Automated laser analysis ; 600/200	LLLLLL	1		0	CO2 Laser	4	4	0	0	0	1582	1394
Xi	D	6	4.19721	0.0154548	0.13672	6.9584	0.675632	3.73173	0.000939597	51.2579	1.34692	457.851	29.7486	1400	Unknown; Automated laser analysis ; 600/200	nm-108	1.00531	0.00097	1	0		50358-01D	MTK98-017, B2:108	3	1999-08-04	5.72917	3016590000	TW	anorth, 45 mg	0	Takahe		Macintosh HD:Users:mcintosh:Documents: Atlas Wilch 2019: MBL MS Data:Takahe:MS Data Takahe iso all:MS Lookup Table	7.875	Bs Mult = L; Ar 40 = L; Ar 39 = L; Ar 38 = L; Ar 37 = L; Ar 36 = L; Ar 40 = L, del cyc 1 2; Ar 39 = L, del cyc 1; Ar 38 = L; Ar 37 = L, del cyc 1 2; Ar 36 = L @ ---	Unknown; Automated laser analysis ; 600/200	LLLLLL	1		0	CO2 Laser	6	6	0	0	0	1589	1400
Xi	E	8	3.64175	0.0161122	0.151909	8.3013	1.84552	3.35862	0.00105242	32.9585	4.7694	255.452	12.2116	1359	Unknown; Automated laser analysis ; 600/200	nm-108	1.00531	0.00097	1	0		50358-01E	MTK98-017, B2:108	3	1999-08-04	6.50278	3016593000	TW	anorth, 45 mg	0	Takahe		Macintosh HD:Users:mcintosh:Documents: Atlas Wilch 2019: MBL MS Data:Takahe:MS Data Takahe iso all:MS Lookup Table	7.875	Bs Mult = L; Ar 40 = L; Ar 39 = L; Ar 38 = L; Ar 37 = L; Ar 36 = L; Ar 40 = L, del cyc 1 2; Ar 39 = L, del cyc 1; Ar 38 = L; Ar 37 = L, del cyc 1 2; Ar 36 = L @ ---	Unknown; Automated laser analysis ; 600/200	LLLLLL	1		0	CO2 Laser	8	8	0	0	0	1548	1359
Xi	F	10	1.21099	0.0144258	0.152665	1.7693	3.15209	3.34199	0.000923515	57.7841	10.6149	148.934	6.27889	1356	Unknown; Automated laser analysis ; 600/200	nm-108	1.00531	0.00097	1	0		50358-01F	MTK98-017, B2:108	3	1999-08-04	7.05806	3016595000	TW	anorth, 45 mg	0	Takahe		Macintosh HD:Users:mcintosh:Documents: Atlas Wilch 2019: MBL MS Data:Takahe:MS Data Takahe iso all:MS Lookup Table	7.875	Bs Mult = L; Ar 40 = L; Ar 39 = L; Ar 38 = L; Ar 37 = L; Ar 36 = L; Ar 40 = L, del cyc 1 2; Ar 39 = L, del cyc 1; Ar 38 = L; Ar 37 = L, del cyc 1 2; Ar 36 = L @ ---	Unknown; Automated laser analysis ; 600/200	LLLLLL	1		0	CO2 Laser	10	10	0	0	0	1545	1356
Xi	G	12	0.789622	0.0139656	0.157554	0.8254	3.02988	3.23827	0.000844986	70.6261	16.2337	118.695	7.49277	1359	Unknown; Automated laser analysis ; 600/200	nm-108	1.00531	0.00097	1	0		50358-01G	MTK98-017, B2:108	3	1999-08-04	7.86555	3016598000	TW	anorth, 45 mg	0	Takahe		Macintosh HD:Users:mcintosh:Documents: Atlas Wilch 2019: MBL MS Data:Takahe:MS Data Takahe iso all:MS Lookup Table	7.875	Bs Mult = L; Ar 40 = L; Ar 39 = L; Ar 38 = L; Ar 37 = L; Ar 36 = L; Ar 40 = L, del cyc 1 2; Ar 39 = L, del cyc 1; Ar 38 = L; Ar 37 = L, del cyc 1 2; Ar 36 = L @ ---	Unknown; Automated laser analysis ; 600/200	LLLLLL	1		0	CO2 Laser	12	12	0	0	0	1549	1359
Xi	H	14	0.64144	0.0127719	0.163443	0.8146	4.8402	3.1216	0.000514947	64.4068	25.2098	87.9311	5.33974	1362	Unknown; Automated laser analysis ; 600/200	nm-108	1.00531	0.00097	1	0		50358-01H	MTK98-017, B2:108	3	1999-08-04	8.43028	3016600000	TW	anorth, 45 mg	0	Takahe		Macintosh HD:Users:mcintosh:Documents: Atlas Wilch 2019: MBL MS Data:Takahe:MS Data Takahe iso all:MS Lookup Table	7.875	Bs Mult = L; Ar 40 = L; Ar 39 = L; Ar 38 = L; Ar 37 = L; Ar 36 = L; Ar 40 = L, del cyc 1; Ar 39 = L, del cyc 1; Ar 38 = L; Ar 37 = L, del cyc 1; Ar 36 = L @ ---	Unknown; Automated laser analysis ; 600/200	LLLLLL	1		0	CO2 Laser	14	14	0	0	0	1552	1362
Xi	J	6	0.380297	0.0155635	0.163374	0.0461	2.03244	3.12291	0.0013281	99.6969	28.9789	80.6975	11.1728	9507	Unknown; Automated laser analysis ; 600/200	nm-108	1.00531	0.00097	1	0		50358-01J	MTK98-017, B2:108	3	1999-08-04	9.19222	3016603000	TW	anorth, 45 mg	0	Takahe		Macintosh HD:Users:mcintosh:Documents: Atlas Wilch 2019: MBL MS Data:Takahe:MS Data Takahe iso all:MS Lookup Table	7.875	Bs Mult = L; Ar 40 = L; Ar 39 = L; Ar 38 = L; Ar 37 = L; Ar 36 = L; Ar 40 = L, del cyc 1; Ar 39 = L, del cyc 1; Ar 38 = L; Ar 37 = L, del cyc 1; Ar 36 = L @ ---	Unknown; Automated laser analysis ; 600/200	LLLLLL	1		0	CO2 Laser	6	6	0	0	0	9695	9507
Xi	K	12	0.331803	0.0132454	0.157427	0.6558	16.4758	3.2409	0.000654249	45.2007	59.5328	31.9216	1.09365	9465	Unknown; Automated laser analysis ; 600/200	nm-108	1.00531	0.00097	1	0		50358-01K	MTK98-017, B2:108	3	1999-08-04	10.0083	3016606000	TW	anorth, 45 mg	0	Takahe		Macintosh HD:Users:mcintosh:Documents: Atlas Wilch 2019: MBL MS Data:Takahe:MS Data Takahe iso all:MS Lookup Table	7.875	Bs Mult = L; Ar 40 = L; Ar 39 = L; Ar 38 = L; Ar 37 = L; Ar 36 = L; Ar 40 = L, del cyc 1 2; Ar 39 = L, del cyc 1; Ar 38 = L; Ar 37 = L, del cyc 1 2; Ar 36 = L @ ---	Unknown; Automated laser analysis ; 600/200	LLLLLL	1		0	CO2 Laser	12	12	0	0	0	9658	9465
Xi	L	18	0.320837	0.0138811	0.157204	0.6019	5.44412	3.24549	0.000833145	48.2863	69.6288	32.9737	3.01832	9470	Unknown; Automated laser analysis ; 600/200	nm-108	1.00531	0.00097	1	0		50358-01L	MTK98-017, B2:108	3	1999-08-04	10.555	3016608000	TW	anorth, 45 mg	0	Takahe		Macintosh HD:Users:mcintosh:Documents: Atlas Wilch 2019: MBL MS Data:Takahe:MS Data Takahe iso all:MS Lookup Table	7.875	Bs Mult = L; Ar 40 = L; Ar 39 = L; Ar 38 = L; Ar 37 = L; Ar 36 = L; Ar 40 = L, del cyc 1 2; Ar 39 = L, del cyc 1; Ar 38 = L; Ar 37 = L, del cyc 1 2; Ar 36 = L @ ---	Unknown; Automated laser analysis ; 600/200	LLLLLL	1		0	CO2 Laser	18	18	0	0	0	9661	9470
	M	25	0.311958	0.0143484	0.167989	0.7313	5.92963	3.03713	0.000956075	34.8301	80.6252	23.1268	3.43616	9515	Unknown; Automated laser analysis ; 600/200	nm-108	1.00531	0.00097	1	0		50358-01M	MTK98-017, B2:108	3	1999-08-04	11.3286	3016610000	TW	anorth, 45 mg	0	Takahe		Macintosh HD:Users:mcintosh:Documents: Atlas Wilch 2019: MBL MS Data:Takahe:MS Data Takahe iso all:MS Lookup Table	7.875	Bs Mult = L; Ar 40 = L; Ar 39 = L; Ar 38 = L; Ar 37 = L; Ar 36 = L; Ar 40 = L, del cyc 1; Ar 39 = L, del cyc 1; Ar 38 = L; Ar 37 = L, del cyc 1; Ar 36 = L @ ---	Unknown; Automated laser analysis ; 600/200	LLLLLL	1		0	CO2 Laser	25	25	0	0	0	9704	9515
	N	45	0.190383	0.0137549	0.168298	0.3533	10.4476	3.03155	0.000811236	51.8815	100	21.0235	1.87734	9501	Unknown; Automated laser analysis ; 600/200	nm-108	1.00531	0.00097	1	0		50358-01N	MTK98-017, B2:108	3	1999-08-04	11.8814	3016612000	TW	anorth, 45 mg	0	Takahe		Macintosh HD:Users:mcintosh:Documents: Atlas Wilch 2019: MBL MS Data:Takahe:MS Data Takahe iso all:MS Lookup Table	7.875	Bs Mult = L; Ar 40 = L; Ar 39 = L; Ar 38 = L; Ar 37 = L; Ar 36 = L; Ar 40 = L, del cyc 1; Ar 39 = L, del cyc 1; Ar 38 = L; Ar 37 = L, del cyc 1; Ar 36 = L @ ---	Unknown; Automated laser analysis ; 600/200	LLLLLL	1		0	CO2 Laser	45	45	0	0	0	9691	9501
	Integrated age ± 2s				n=11		53.9235	3.17479			K2O=3.90%	60.9436	2.66336			nm-108
	Plateau ± 2s		steps M-N		n=2	MSWD=0.29	16.3772	3.0 ±0.0			30.3712	21.507	3.29527			nm-108
	Isochron±2s		steps M-N		n=2	MSWD=0.00		40Ar/36Ar=		321.7±105.6		19.3074	9.57682
	MTK98-24, C2, anorthoclase, 3 holes, 35.77, J=0.0001178±0.10%, D=1.00531±0.00097, nm-108, Lab#=50361-03, MAP
Xi	B	2	14.4979	0.0399393	0.13746	43.3447	0.0550457	3.71165	0.00583819	11.7286	0.13335	361.43	245.332	8971	Unknown; Automated laser analysis ; 600/200	nm-108	1.00531	0.00097	1	0		50361-03B	MTK98-24, C2	3	1999-08-02	9.97972	3016433000	TW	anorthoclase, 3 holes, 35.77	0	Mt. Takahe		Macintosh HD:Users:mcintosh:Documents: Atlas Wilch 2019: MBL MS Data:Takahe:MS Data Takahe iso all:MS Lookup Table	7.875	Bs Mult = L; Ar 40 = L; Ar 39 = L; Ar 38 = L; Ar 37 = L; Ar 36 = L; Ar 40 = L, del cyc 1; Ar 39 = L, del cyc 1; Ar 38 = L; Ar 37 = L, del cyc 1; Ar 36 = L @ ---	Unknown; Automated laser analysis ; 600/200	LLLLLL	1		0	CO2 Laser	2	2	0	0	0	9159	8971
Xi	C	4	1.90371	0.0183345	0.142113	5.3413	1.2651	3.59013	0.00182118	17.6607	3.19809	71.4691	12.2781	8939	Unknown; Automated laser analysis ; 600/200	nm-108	1.00531	0.00097	1	0		50361-03C	MTK98-24, C2	3	1999-08-02	10.545	3016435000	TW	anorthoclase, 3 holes, 35.77	0	Mt. Takahe		Macintosh HD:Users:mcintosh:Documents: Atlas Wilch 2019: MBL MS Data:Takahe:MS Data Takahe iso all:MS Lookup Table	7.875	Bs Mult = L; Ar 40 = L; Ar 39 = L; Ar 38 = L; Ar 37 = L; Ar 36 = L; Ar 40 = L, del cyc 1 2; Ar 39 = L, del cyc 1; Ar 38 = L; Ar 37 = L, del cyc 1 2; Ar 36 = L @ ---	Unknown; Automated laser analysis ; 600/200	LLLLLL	1		0	CO2 Laser	4	4	0	0	0	9127	8939
	D	6	0.707788	0.0149925	0.136098	2.1127	4.07704	3.74879	0.00106245	13.2558	13.0749	19.9444	3.71952	8988	Unknown; Automated laser analysis ; 600/200	nm-108	1.00531	0.00097	1	0		50361-03D	MTK98-24, C2	3	1999-08-02	11.0933	3016437000	TW	anorthoclase, 3 holes, 35.77	0	Mt. Takahe		Macintosh HD:Users:mcintosh:Documents: Atlas Wilch 2019: MBL MS Data:Takahe:MS Data Takahe iso all:MS Lookup Table	7.875	Bs Mult = L; Ar 40 = L; Ar 39 = L; Ar 38 = L; Ar 37 = L; Ar 36 = L; Ar 40 = L, del cyc 1 2; Ar 39 = L, del cyc 1; Ar 38 = L; Ar 37 = L, del cyc 1 2; Ar 36 = L @ ---	Unknown; Automated laser analysis ; 600/200	LLLLLL	1		0	CO2 Laser	6	6	0	0	0	9177	8988
	E	8	0.514463	0.0137336	0.127643	1.4264	7.58985	3.99711	0.000749109	19.9488	31.4616	21.8163	2.59377	8969	Unknown; Automated laser analysis ; 600/200	nm-108	1.00531	0.00097	1	0		50361-03E	MTK98-24, C2	3	1999-08-02	11.8456	3016439000	TW	anorthoclase, 3 holes, 35.77	0	Mt. Takahe		Macintosh HD:Users:mcintosh:Documents: Atlas Wilch 2019: MBL MS Data:Takahe:MS Data Takahe iso all:MS Lookup Table	7.875	Bs Mult = L; Ar 40 = L; Ar 39 = L; Ar 38 = L; Ar 37 = L; Ar 36 = L; Ar 40 = L, del cyc 1 2; Ar 39 = L, del cyc 1; Ar 38 = L; Ar 37 = L, del cyc 1 2; Ar 36 = L @ ---	Unknown; Automated laser analysis ; 600/200	LLLLLL	1		0	CO2 Laser	8	8	0	0	0	9159	8969
	F	10	0.549717	0.0141205	0.126553	1.401	6.96228	4.03155	0.000857588	26.4369	48.328	30.8929	2.91131	8989	Unknown; Automated laser analysis ; 600/200	nm-108	1.00531	0.00097	1	0		50361-03F	MTK98-24, C2	3	1999-08-02	12.3822	3016441000	TW	anorthoclase, 3 holes, 35.77	0	Mt. Takahe		Macintosh HD:Users:mcintosh:Documents: Atlas Wilch 2019: MBL MS Data:Takahe:MS Data Takahe iso all:MS Lookup Table	7.875	Bs Mult = L; Ar 40 = L; Ar 39 = L; Ar 38 = L; Ar 37 = L; Ar 36 = L; Ar 40 = L, del cyc 1; Ar 39 = L, del cyc 1; Ar 38 = L; Ar 37 = L, del cyc 1; Ar 36 = L @ ---	Unknown; Automated laser analysis ; 600/200	LLLLLL	1		0	CO2 Laser	10	10	0	0	0	9177	8989
	G	12	0.651989	0.0147024	0.120573	1.8007	4.22498	4.2315	0.000997992	19.7907	58.5631	27.4289	4.61506	8968	Unknown; Automated laser analysis ; 600/200	nm-108	1.00531	0.00097	1	0		50361-03G	MTK98-24, C2	3	1999-08-02	12.9494	3016443000	TW	anorthoclase, 3 holes, 35.77	0	Mt. Takahe		Macintosh HD:Users:mcintosh:Documents: Atlas Wilch 2019: MBL MS Data:Takahe:MS Data Takahe iso all:MS Lookup Table	7.875	Bs Mult = L; Ar 40 = L; Ar 39 = L; Ar 38 = L; Ar 37 = L; Ar 36 = L; Ar 40 = L, del cyc 1; Ar 39 = L, del cyc 1; Ar 38 = L; Ar 37 = L, del cyc 1; Ar 36 = L @ ---	Unknown; Automated laser analysis ; 600/200	LLLLLL	1		0	CO2 Laser	12	12	0	0	0	9158	8968
	H	14	0.646331	0.0153863	0.123851	1.8202	2.758	4.11949	0.00118649	18.2359	65.2445	25.0548	6.75896	8989	Unknown; Automated laser analysis ; 600/200	nm-108	1.00531	0.00097	1	0		50361-03H	MTK98-24, C2	3	1999-08-02	13.4958	3016445000	TW	anorthoclase, 3 holes, 35.77	0	Mt. Takahe		Macintosh HD:Users:mcintosh:Documents: Atlas Wilch 2019: MBL MS Data:Takahe:MS Data Takahe iso all:MS Lookup Table	7.875	Bs Mult = L; Ar 40 = L; Ar 39 = L; Ar 38 = L; Ar 37 = L; Ar 36 = L; Ar 40 = L, del cyc 1; Ar 39 = L, del cyc 1; Ar 38 = L; Ar 37 = L, del cyc 1; Ar 36 = L @ ---	Unknown; Automated laser analysis ; 600/200	LLLLLL	1		0	CO2 Laser	14	14	0	0	0	9176	8989
	I	25	1.15694	0.0152895	0.111256	3.604	5.30045	4.58586	0.00106709	8.67657	78.085	21.3384	3.58525	8957	Unknown; Automated laser analysis ; 600/200	nm-108	1.00531	0.00097	1	0		50361-03I	MTK98-24, C2	3	1999-08-02	14.255	3016448000	TW	anorthoclase, 3 holes, 35.77	0	Mt. Takahe		Macintosh HD:Users:mcintosh:Documents: Atlas Wilch 2019: MBL MS Data:Takahe:MS Data Takahe iso all:MS Lookup Table	7.875	Bs Mult = L; Ar 40 = L; Ar 39 = L; Ar 38 = L; Ar 37 = L; Ar 36 = L; Ar 40 = L, del cyc 1 2; Ar 39 = L, del cyc 1; Ar 38 = L; Ar 37 = L, del cyc 1 2; Ar 36 = L @ ---	Unknown; Automated laser analysis ; 600/200	LLLLLL	1		0	CO2 Laser	25	25	0	0	0	9146	8957
	J	45	0.501413	0.0142951	0.129234	1.4437	9.04628	3.94792	0.000903788	16.8742	100	17.9858	1.84468	8939	Unknown; Automated laser analysis ; 600/200	nm-108	1.00531	0.00097	1	0		50361-03J	MTK98-24, C2	3	1999-08-02	14.8364	3016450000	TW	anorthoclase, 3 holes, 35.77	0	Mt. Takahe		Macintosh HD:Users:mcintosh:Documents: Atlas Wilch 2019: MBL MS Data:Takahe:MS Data Takahe iso all:MS Lookup Table	7.875	Bs Mult = L; Ar 40 = L; Ar 39 = L; Ar 38 = L; Ar 37 = L; Ar 36 = L; Ar 40 = L, del cyc 1; Ar 39 = L, del cyc 1; Ar 38 = L; Ar 37 = L, del cyc 1; Ar 36 = L @ ---	Unknown; Automated laser analysis ; 600/200	LLLLLL	1		0	CO2 Laser	45	45	0	0	0	9128	8939
	Integrated age ± 2s				n=9		41.279	4.04864				25.0066	2.75713			nm-108
	Plateau ± 2s		steps D-J		n=7	MSWD=2.67	39.9589	4.1 ±0.5			96.8019	21.9538	3.6993			nm-108
	Isochron±2s		steps D-J		n=7	MSWD=3.20		40Ar/36Ar=		297.2±16.4		21.3324	5.23855
	MTK98-027, C4:108, anorthoclase, 36.26 mg, J=0.0001182±0.10%, D=1.00531±0.00097, nm-108, Lab#=50362-01, MAP
Xi	A	1	47.174	0.0568942	0.0149647	73.1981	0.0190578	34.0938	0.00898618	54.1522	0.0881046	5438.36	464.527	8544	Unknown; Automated laser analysis ; 600/200	nm-108	1.00531	0.00097	1	0		50362-01A	MTK98-027, C4:108	3	1999-08-09	0.889444	3017005000	TW	anorthoclase, 36.26 mg	0	Mt. Takahe		Macintosh HD:Users:mcintosh:Documents: Atlas Wilch 2019: MBL MS Data:Takahe:MS Data Takahe iso all:MS Lookup Table	7.875	Bs Mult = L; Ar 40 = L; Ar 39 = L; Ar 38 = L; Ar 37 = L; Ar 36 = L; Ar 40 = L, del cyc 1; Ar 39 = L, del cyc 1; Ar 38 = L; Ar 37 = L, del cyc 1; Ar 36 = L @ ---	Unknown; Automated laser analysis ; 600/200	LLLLLL	1		0	CO2 Laser	1	1	0	0	0	8734	8544
Xi	B	3	9.28246	0.0224715	0.118616	8.4826	0.269396	4.3013	0.00280415	73.0953	1.33353	1446.15	32.2835	8540	Unknown; Automated laser analysis ; 600/200	nm-108	1.00531	0.00097	1	0		50362-01B	MTK98-027, C4:108	3	1999-08-09	1.50306	3017007000	TW	anorthoclase, 36.26 mg	0	Mt. Takahe		Macintosh HD:Users:mcintosh:Documents: Atlas Wilch 2019: MBL MS Data:Takahe:MS Data Takahe iso all:MS Lookup Table	7.875	Bs Mult = L; Ar 40 = L; Ar 39 = L; Ar 38 = L; Ar 37 = L; Ar 36 = L; Ar 40 = L, del cyc 1 2; Ar 39 = L, del cyc 1 2; Ar 38 = L; Ar 37 = L, del cyc 1 2; Ar 36 = L @ ---	Unknown; Automated laser analysis ; 600/200	LLLLLL	1		0	CO2 Laser	3	3	0	0	0	8729	8540
Xi	C	6	7.21558	0.0175435	0.138471	23.8078	3.18369	3.68454	0.000645699	2.64548	16.0518	40.7016	8.36388	8544	Unknown; Automated laser analysis ; 600/200	nm-108	1.00531	0.00097	1	0		50362-01C	MTK98-027, C4:108	3	1999-08-09	2.31528	3017010000	TW	anorthoclase, 36.26 mg	0	Mt. Takahe		Macintosh HD:Users:mcintosh:Documents: Atlas Wilch 2019: MBL MS Data:Takahe:MS Data Takahe iso all:MS Lookup Table	7.875	Bs Mult = L; Ar 40 = L; Ar 39 = L; Ar 38 = L; Ar 37 = L; Ar 36 = L @ ---	Unknown; Automated laser analysis ; 600/200	LLLLLL	1		0	CO2 Laser	6	6	0	0	0	8734	8544
	D	9	0.806017	0.0144707	0.125585	2.4516	6.29275	4.06261	0.00090018	11.3014	45.1434	19.4227	1.69334	8545	Unknown; Automated laser analysis ; 600/200	nm-108	1.00531	0.00097	1	0		50362-01D	MTK98-027, C4:108	3	1999-08-09	2.82222	3017012000	TW	anorthoclase, 36.26 mg	0	Mt. Takahe		Macintosh HD:Users:mcintosh:Documents: Atlas Wilch 2019: MBL MS Data:Takahe:MS Data Takahe iso all:MS Lookup Table	7.875	Bs Mult = L; Ar 40 = L; Ar 39 = L; Ar 38 = L; Ar 37 = L; Ar 36 = L; Ar 40 = L, del cyc 1 2; Ar 39 = L, del cyc 1 2; Ar 38 = L; Ar 37 = L, del cyc 1 2; Ar 36 = L @ ---	Unknown; Automated laser analysis ; 600/200	LLLLLL	1		0	CO2 Laser	9	9	0	0	0	8734	8545
	E	12	0.242343	0.0137462	0.115942	0.5388	3.7827	4.40053	0.000798376	37.9225	62.6309	19.5956	2.7588	8542	Unknown; Automated laser analysis ; 600/200	nm-108	1.00531	0.00097	1	0		50362-01E	MTK98-027, C4:108	3	1999-08-09	3.55806	3017014000	TW	anorthoclase, 36.26 mg	0	Mt. Takahe		Macintosh HD:Users:mcintosh:Documents: Atlas Wilch 2019: MBL MS Data:Takahe:MS Data Takahe iso all:MS Lookup Table	7.875	Bs Mult = L; Ar 40 = L; Ar 39 = L; Ar 38 = L; Ar 37 = L; Ar 36 = L; Ar 40 = L, del cyc 1; Ar 39 = L, del cyc 1; Ar 38 = L; Ar 37 = L, del cyc 1; Ar 36 = L @ ---	Unknown; Automated laser analysis ; 600/200	LLLLLL	1		0	CO2 Laser	12	12	0	0	0	8732	8542
	F	15	0.280648	0.0150347	0.111408	0.5087	1.92953	4.5796	0.0011568	49.4539	71.5512	29.5931	5.22927	8543	Unknown; Automated laser analysis ; 600/200	nm-108	1.00531	0.00097	1	0		50362-01F	MTK98-027, C4:108	3	1999-08-09	4.10222	3017016000	TW	anorthoclase, 36.26 mg	0	Mt. Takahe		Macintosh HD:Users:mcintosh:Documents: Atlas Wilch 2019: MBL MS Data:Takahe:MS Data Takahe iso all:MS Lookup Table	7.875	Bs Mult = L; Ar 40 = L; Ar 39 = L; Ar 38 = L; Ar 37 = L; Ar 36 = L; Ar 40 = L, del cyc 1; Ar 39 = L, del cyc 1; Ar 38 = L; Ar 37 = L, del cyc 1; Ar 36 = L @ ---	Unknown; Automated laser analysis ; 600/200	LLLLLL	1		0	CO2 Laser	15	15	0	0	0	8731	8543
Xi	G	25	0.266967	0.0142726	0.11086	0.3645	2.29339	4.60225	0.000953144	62.8071	82.1535	35.7516	2.96778	8546	Unknown; Automated laser analysis ; 600/200	nm-108	1.00531	0.00097	1	0		50362-01G	MTK98-027, C4:108	3	1999-08-09	4.85917	3017019000	TW	anorthoclase, 36.26 mg	0	Mt. Takahe		Macintosh HD:Users:mcintosh:Documents: Atlas Wilch 2019: MBL MS Data:Takahe:MS Data Takahe iso all:MS Lookup Table	7.875	Bs Mult = L; Ar 40 = L; Ar 39 = L; Ar 38 = L; Ar 37 = L; Ar 36 = L; Ar 40 = L, del cyc 1; Ar 39 = L, del cyc 1; Ar 38 = L; Ar 37 = L, del cyc 1; Ar 36 = L @ ---	Unknown; Automated laser analysis ; 600/200	LLLLLL	1		0	CO2 Laser	25	25	0	0	0	8736	8546
Xi	H	45	0.165954	0.0135321	0.122541	0.2622	3.86034	4.16354	0.000753495	58.9034	100	20.8431	1.83612	8541	Unknown; Automated laser analysis ; 600/200	nm-108	1.00531	0.00097	1	0		50362-01H	MTK98-027, C4:108	3	1999-08-09	5.43639	3017021000	TW	anorthoclase, 36.26 mg	0	Mt. Takahe		Macintosh HD:Users:mcintosh:Documents: Atlas Wilch 2019: MBL MS Data:Takahe:MS Data Takahe iso all:MS Lookup Table	7.875	Bs Mult = L; Ar 40 = L; Ar 39 = L; Ar 38 = L; Ar 37 = L; Ar 36 = L; Ar 40 = L, del cyc 1; Ar 39 = L, del cyc 1; Ar 38 = L; Ar 37 = L, del cyc 1; Ar 36 = L @ ---	Unknown; Automated laser analysis ; 600/200	LLLLLL	1		0	CO2 Laser	45	45	0	0	0	8730	8541
	Integrated age ± 2s				n=8		21.6309	4.17443			K2O=1.94%	49.9315	3.6678			nm-108
	Plateau ± 2s		steps D-F		n=3	MSWD=1.74	12.005	4.3 ±0.5			55.4994	20.1865	3.6731			nm-108
	Isochron±2s		steps D-F		n=3	MSWD=2.95		40Ar/36Ar=		290.2±14.3		22.2315	5.8936
	MTK98-039, F3:108, anorth, 37.1 mg, J=0.0001183±0.10%, D=1.00531±0.00097, nm-108, Lab#=50378-01, MAP
X	A	1	117.492	0.684017	0.238202	342.197	0.00176313	2.1419	0.168804	13.9639	0.0091961	3497.38	4575.73	8554	Unknown; Automated laser analysis ; 600/200	nm-108	1.00531	0.00097	1	0		50378-01A	MTK98-039, F3:108	3	1999-08-08	19.5689	3016986000	TW	anorth, 37.1 mg	0	Mt. Takahe		Macintosh HD:Users:mcintosh:Documents: Atlas Wilch 2019: MBL MS Data:Takahe:MS Data Takahe iso all:MS Lookup Table	7.875	Bs Mult = L; Ar 40 = L; Ar 39 = L; Ar 38 = L; Ar 37 = L; Ar 36 = L @ ---	Unknown; Automated laser analysis ; 600/200	LLLLLL	1		0	CO2 Laser	1	1	0	0	0	8743	8554
X	B	3	2.96123	0.0188503	0.154634	7.4474	0.252043	3.29942	0.00185522	26.0829	1.3238	164.791	32.431	8543	Unknown; Automated laser analysis ; 600/200	nm-108	1.00531	0.00097	1	0		50378-01B	MTK98-039, F3:108	3	1999-08-08	20.1894	3016988000	TW	anorth, 37.1 mg	0	Mt. Takahe		Macintosh HD:Users:mcintosh:Documents: Atlas Wilch 2019: MBL MS Data:Takahe:MS Data Takahe iso all:MS Lookup Table	7.875	Bs Mult = L; Ar 40 = L; Ar 39 = L; Ar 38 = L; Ar 37 = L; Ar 36 = L; Ar 40 = L, del cyc 1 2; Ar 39 = L, del cyc 1 2; Ar 38 = L; Ar 37 = L, del cyc 1 2; Ar 36 = L @ ---	Unknown; Automated laser analysis ; 600/200	LLLLLL	1		0	CO2 Laser	3	3	0	0	0	8733	8543
	C	6	0.565588	0.0140421	0.156064	1.4693	3.52281	3.26919	0.00083281	25.3312	19.698	30.5687	2.81759	8557	Unknown; Automated laser analysis ; 600/200	nm-108	1.00531	0.00097	1	0		50378-01C	MTK98-039, F3:108	3	1999-08-08	20.9669	3016991000	TW	anorth, 37.1 mg	0	Mt. Takahe		Macintosh HD:Users:mcintosh:Documents: Atlas Wilch 2019: MBL MS Data:Takahe:MS Data Takahe iso all:MS Lookup Table	7.875	Bs Mult = L; Ar 40 = L; Ar 39 = L; Ar 38 = L; Ar 37 = L; Ar 36 = L; Ar 40 = L, del cyc 1; Ar 39 = L, del cyc 1; Ar 38 = L; Ar 37 = L, del cyc 1; Ar 36 = L @ ---	Unknown; Automated laser analysis ; 600/200	LLLLLL	1		0	CO2 Laser	6	6	0	0	0	8745	8557
	D	9	0.260221	0.0141262	0.150123	0.5302	5.9548	3.39857	0.000904643	44.1754	50.757	24.5269	1.56594	8545	Unknown; Automated laser analysis ; 600/200	nm-108	1.00531	0.00097	1	0		50378-01D	MTK98-039, F3:108	3	1999-08-08	21.5233	3016993000	TW	anorth, 37.1 mg	0	Mt. Takahe		Macintosh HD:Users:mcintosh:Documents: Atlas Wilch 2019: MBL MS Data:Takahe:MS Data Takahe iso all:MS Lookup Table	7.875	Bs Mult = L; Ar 40 = L; Ar 39 = L; Ar 38 = L; Ar 37 = L; Ar 36 = L; Ar 40 = L, del cyc 1; Ar 39 = L, del cyc 1; Ar 38 = L; Ar 37 = L, del cyc 1; Ar 36 = L @ ---	Unknown; Automated laser analysis ; 600/200	LLLLLL	1		0	CO2 Laser	9	9	0	0	0	8734	8545
X	E	12	0.875873	0.0140478	0.141189	1.7927	3.19414	3.61363	0.000817401	40.7438	67.417	76.1404	3.22985	8546	Unknown; Automated laser analysis ; 600/200	nm-108	1.00531	0.00097	1	0		50378-01E	MTK98-039, F3:108	3	1999-08-08	22.2717	3016995000	TW	anorth, 37.1 mg	0	Mt. Takahe		Macintosh HD:Users:mcintosh:Documents: Atlas Wilch 2019: MBL MS Data:Takahe:MS Data Takahe iso all:MS Lookup Table	7.875	Bs Mult = L; Ar 40 = L; Ar 39 = L; Ar 38 = L; Ar 37 = L; Ar 36 = L; Ar 40 = L, del cyc 1; Ar 39 = L, del cyc 1; Ar 38 = L; Ar 37 = L, del cyc 1; Ar 36 = L @ ---	Unknown; Automated laser analysis ; 600/200	LLLLLL	1		0	CO2 Laser	12	12	0	0	0	8736	8546
X	F	15	0.676972	0.01468	0.145333	1.5692	1.43835	3.51058	0.00100418	33.1383	74.9192	47.8649	6.49975	8544	Unknown; Automated laser analysis ; 600/200	nm-108	1.00531	0.00097	1	0		50378-01F	MTK98-039, F3:108	3	1999-08-08	22.8206	3016997000	TW	anorth, 37.1 mg	0	Mt. Takahe		Macintosh HD:Users:mcintosh:Documents: Atlas Wilch 2019: MBL MS Data:Takahe:MS Data Takahe iso all:MS Lookup Table	7.875	Bs Mult = L; Ar 40 = L; Ar 39 = L; Ar 38 = L; Ar 37 = L; Ar 36 = L; Ar 40 = L, del cyc 1; Ar 39 = L, del cyc 1; Ar 38 = L; Ar 37 = L, del cyc 1; Ar 36 = L @ ---	Unknown; Automated laser analysis ; 600/200	LLLLLL	1		0	CO2 Laser	15	15	0	0	0	8734	8544
X	G	25	0.990235	0.0155688	0.148145	2.7548	1.2263	3.44396	0.00118905	18.9329	81.3153	40.0014	7.70193	8543	Unknown; Automated laser analysis ; 600/200	nm-108	1.00531	0.00097	1	0		50378-01G	MTK98-039, F3:108	3	1999-08-08	23.5767	3017000000	TW	anorth, 37.1 mg	0	Mt. Takahe		Macintosh HD:Users:mcintosh:Documents: Atlas Wilch 2019: MBL MS Data:Takahe:MS Data Takahe iso all:MS Lookup Table	7.875	Bs Mult = L; Ar 40 = L; Ar 39 = L; Ar 38 = L; Ar 37 = L; Ar 36 = L; Ar 40 = L, del cyc 1; Ar 39 = L, del cyc 1; Ar 38 = L; Ar 37 = L, del cyc 1; Ar 36 = L @ ---	Unknown; Automated laser analysis ; 600/200	LLLLLL	1		0	CO2 Laser	25	25	0	0	0	8732	8543
X	H	45	0.536231	0.0136494	0.152512	1.3385	3.58234	3.34533	0.000730736	28.4026	100	32.4961	2.72497	8746	Unknown; Automated laser analysis ; 600/200	nm-108	1.00531	0.00097	1	0		50378-01H	MTK98-039, F3:108	3	1999-08-09	0.128333	3017002000	TW	anorth, 37.1 mg	0	Mt. Takahe		Macintosh HD:Users:mcintosh:Documents: Atlas Wilch 2019: MBL MS Data:Takahe:MS Data Takahe iso all:MS Lookup Table	7.875	Bs Mult = L; Ar 40 = L; Ar 39 = L; Ar 38 = L; Ar 37 = L; Ar 36 = L; Ar 40 = L, del cyc 1; Ar 39 = L, del cyc 1; Ar 38 = L; Ar 37 = L, del cyc 1; Ar 36 = L @ ---	Unknown; Automated laser analysis ; 600/200	LLLLLL	1		0	CO2 Laser	45	45	0	0	0	8936	8746
	Integrated age ± 2s				n=8		19.1725	3.40701			K2O=1.68%	40.5996	2.84886			nm-108
	Plateau ± 2s		steps C-D		n=2	MSWD=3.51	9.47761	3.350±0.183			49.4332	25.9527	5.13114			nm-108
	Isochron±2s		steps A-H		n=8	MSWD=10.15		40Ar/36Ar=		410.9±24.4		9.34858	2.09923
	MTK98-055, D5:108, gmass hawaiite, 220.15, J=0.000117±0.10%, D=1.00531±0.00097, nm-108, Lab#=50368-01, MAP
X	A	675	859.741	0.553262	1.34655	2885.43	3.67047	0.378896	0.00101031	0.837664	4.34398	1520.68	729.227	20065	Unknown; Automated furnace analysis ; 600/300	nm-108	1.00531	0.00097	1	0		50368-01A	MTK98-055, D5:108	3	1999-08-03	11.4394	3016524000	TW	gmass hawaiite, 220.15	0	Takahe		Macintosh HD:Users:mcintosh:Documents: Atlas Wilch 2019: MBL MS Data:Takahe:MS Data Takahe iso all:MS Lookup Table	7.875	Bs Mult = L; Ar 40 = L; Ar 39 = L; Ar 38 = L; Ar 37 = L; Ar 36 = L @ ---	Unknown; Automated furnace analysis ; 600/300	LLLLLL	1		0	Eurotherm	675	675	0	0	0	35997	20065
X	B	750	9.65583	0.0187768	1.90367	31.4998	12.6773	0.26801	0.000619226	5.11334	19.3475	104.336	9.98913	17238	Unknown; 600/300	nm-108	1.00531	0.00097	1	0		50368-01B	MTK98-055, D5:108	3	1999-08-03	11.9342	3016526000	TW	gmass hawaiite, 220.15	0	Takahe		Macintosh HD:Users:mcintosh:Documents: Atlas Wilch 2019: MBL MS Data:Takahe:MS Data Takahe iso all:MS Lookup Table	7.875	Bs Mult = L; Ar 40 = L; Ar 39 = L; Ar 38 = L; Ar 37 = L; Ar 36 = L @ ---	Unknown; 600/300	LLLLLL	1		0	Eurotherm	750	750	0	0	0	29618	17238
	C	800	9.2414	0.0187981	1.549	30.5838	5.82805	0.329377	0.000666498	3.49251	26.245	68.1887	11.4337	15047	Unknown; Automated furnace analysis ; 600/300	nm-108	1.00531	0.00097	1	0		50368-01C	MTK98-055, D5:108	3	1999-08-03	12.8583	3016529000	TW	gmass hawaiite, 220.15	0	Takahe		Macintosh HD:Users:mcintosh:Documents: Atlas Wilch 2019: MBL MS Data:Takahe:MS Data Takahe iso all:MS Lookup Table	7.875	Bs Mult = L; Ar 40 = L; Ar 39 = L; Ar 38 = L; Ar 37 = L; Ar 36 = L @ ---	Unknown; Automated furnace analysis ; 600/300	LLLLLL	1		0	Eurotherm	800	800	0	0	0	28888	15047
	D	850	7.95457	0.0178314	1.23471	26.0806	13.2042	0.413216	0.000626311	4.30529	41.8721	72.3368	7.96258	19469	Unknown; 600/300	nm-108	1.00531	0.00097	1	0		50368-01D	MTK98-055, D5:108	3	1999-08-03	13.3528	3016531000	TW	gmass hawaiite, 220.15	0	Takahe		Macintosh HD:Users:mcintosh:Documents: Atlas Wilch 2019: MBL MS Data:Takahe:MS Data Takahe iso all:MS Lookup Table	7.875	Bs Mult = L; Ar 40 = L; Ar 39 = L; Ar 38 = L; Ar 37 = L; Ar 36 = L @ ---	Unknown; 600/300	LLLLLL	1		0	Eurotherm	850	850	0	0	0	29153	19469
	E	925	8.63419	0.0185328	1.35646	28.4111	8.71622	0.37613	0.000702159	3.96996	52.1878	72.4079	9.55855	20013	Unknown; 600/300	nm-108	1.00531	0.00097	1	0		50368-01E	MTK98-055, D5:108	3	1999-08-03	13.8394	3016533000	TW	gmass hawaiite, 220.15	0	Takahe		Macintosh HD:Users:mcintosh:Documents: Atlas Wilch 2019: MBL MS Data:Takahe:MS Data Takahe iso all:MS Lookup Table	7.875	Bs Mult = L; Ar 40 = L; Ar 39 = L; Ar 38 = L; Ar 37 = L; Ar 36 = L @ ---	Unknown; 600/300	LLLLLL	1		0	Eurotherm	925	925	0	0	0	29212	20013
	F	1025	12.2093	0.0203127	1.75358	40.7195	5.29588	0.29095	0.000565179	2.54965	58.4554	65.7769	14.4808	19050	Unknown; 600/300	nm-108	1.00531	0.00097	1	0		50368-01F	MTK98-055, D5:108	3	1999-08-03	14.3258	3016535000	TW	gmass hawaiite, 220.15	0	Takahe		Macintosh HD:Users:mcintosh:Documents: Atlas Wilch 2019: MBL MS Data:Takahe:MS Data Takahe iso all:MS Lookup Table	7.875	Bs Mult = L; Ar 40 = L; Ar 39 = L; Ar 38 = L; Ar 37 = L; Ar 36 = L @ ---	Unknown; 600/300	LLLLLL	1		0	Eurotherm	1025	1025	0	0	0	29095	19050
	G	1125	15.3666	0.024155	1.99595	51.6682	3.52867	0.25562	0.00106822	1.63945	62.6316	53.2418	19.6074	18598	Unknown; Automated furnace analysis ; 600/300	nm-108	1.00531	0.00097	1	0		50368-01G	MTK98-055, D5:108	3	1999-08-03	16.9575	3016544000	TW	gmass hawaiite, 220.15	0	Takahe		Macintosh HD:Users:mcintosh:Documents: Atlas Wilch 2019: MBL MS Data:Takahe:MS Data Takahe iso all:MS Lookup Table	7.875	Bs Mult = L; Ar 40 = L; Ar 39 = L; Ar 38 = L; Ar 37 = L; Ar 36 = L @ ---	Unknown; Automated furnace analysis ; 600/300	LLLLLL	1		0	Eurotherm	1125	1125	0	0	0	28892	18598
	H	1300	26.5489	0.0307493	3.57735	89.7324	30.5567	0.14262	0.000956989	1.15893	98.7953	65.0965	24.9383	20549	Unknown; 600/300; Det. IC= 85.79666	nm-108	1.00531	0.00097	1	0		50368-01H	MTK98-055, D5:108	3	1999-08-03	17.4489	3016546000	TW	gmass hawaiite, 220.15	0	Takahe		Macintosh HD:Users:mcintosh:Documents: Atlas Wilch 2019: MBL MS Data:Takahe:MS Data Takahe iso all:MS Lookup Table	7.875	Bs Mult = L; Bs Far = L; Ar 40 = L; Ar 39 = L; Ar 38 = L; Ar 37 = L; Ar 36 = L @ ---	Unknown; 600/300; Det. IC= 85.79666	LLLLLLL	1		0	Eurotherm	1300	1300	0	0	0	29411	20549
X	I	1750	76.4265	0.0610254	6.86519	254.915	1.01793	0.0743175	0.000893937	2.12802	100	344.862	82.1206	21568	Unknown; 600/300	nm-108	1.00531	0.00097	1	0		50368-01I	MTK98-055, D5:108	3	1999-08-03	18.1486	3016549000	TW	gmass hawaiite, 220.15	0	Takahe		Macintosh HD:Users:mcintosh:Documents: Atlas Wilch 2019: MBL MS Data:Takahe:MS Data Takahe iso all:MS Lookup Table	7.875	Bs Mult = L; Ar 40 = L; Ar 39 = L; Ar 38 = L; Ar 37 = L; Ar 36 = L @ ---	Unknown; 600/300	LLLLLL	1		0	Eurotherm	1750	1750	0	0	0	29074	21568
	Integrated age ± 2s				n=9		84.4954	0.216708				139.284	89.2678			nm-108
	Plateau ± 2s		steps C-H		n=6	MSWD=0.20	67.1297	0.26 ±0.19			79.4478	69.4865	9.60751			nm-108
	Isochron±2s		steps A-I		n=9	MSWD=2.73		40Ar/36Ar=		297.8±1.7		61.0122	13.0253
	MTK98-060, E2:108, gmass hawaiite, 199.99 MG, J=0.0001161±0.11%, D=1.00531±0.00097, nm-108, Lab#=50372-01, MAP
	B	750	3.59966	0.015258	1.19294	11.3263	6.13685	0.427686	0.000676234	9.5635	24.7323	72.1447	4.55644	18240	Unknown; 600/300	nm-108	1.00531	0.00097	1	0		50372-01B	MTK98-060, E3:108	3	1999-08-06	9.44917	3016776000	TW	gmass hawaiite, 199.99 MG	0	Takahe		Macintosh HD:Users:mcintosh:Documents: Atlas Wilch 2019: MBL MS Data:Takahe:MS Data Takahe iso all:MS Lookup Table	7.875	Bs Mult = L; Ar 40 = L; Ar 39 = L; Ar 38 = L; Ar 37 = L; Ar 36 = L @ ---	Unknown; 600/300	LLLLLL	1		0	Eurotherm	750	750	0	0	0	29494	18240
	C	800	3.23037	0.0155079	1.04035	10.3146	2.39522	0.490414	0.000795391	8.11716	34.3854	54.9462	8.16898	15614	Unknown; Automated furnace analysis ; 600/300	nm-108	1.00531	0.00097	1	0		50372-01C	MTK98-060, E3:108	3	1999-08-06	10.3772	3016780000	TW	gmass hawaiite, 199.99 MG	0	Takahe		Macintosh HD:Users:mcintosh:Documents: Atlas Wilch 2019: MBL MS Data:Takahe:MS Data Takahe iso all:MS Lookup Table	7.875	Bs Mult = L; Ar 40 = L; Ar 39 = L; Ar 38 = L; Ar 37 = L; Ar 36 = L; Ar 40 = L, del cyc 1; Ar 39 = L, del cyc 1; Ar 38 = L; Ar 37 = L, del cyc 1; Ar 36 = L @ ---	Unknown; Automated furnace analysis ; 600/300	LLLLLL	1		0	Eurotherm	800	800	0	0	0	28873	15614
	D	850	3.28869	0.0149167	1.05642	10.5952	2.84657	0.482958	0.000617241	7.26215	45.8575	50.0467	7.34967	19671	Unknown; 600/300; Det. IC= 65.87086	nm-108	1.00531	0.00097	1	0		50372-01D	MTK98-060, E3:108	3	1999-08-06	10.8642	3016782000	TW	gmass hawaiite, 199.99 MG	0	Takahe		Macintosh HD:Users:mcintosh:Documents: Atlas Wilch 2019: MBL MS Data:Takahe:MS Data Takahe iso all:MS Lookup Table	7.875	Bs Mult = L; Bs Far = L; Ar 40 = L; Ar 39 = L; Ar 38 = L; Ar 37 = L; Ar 36 = L; Ar 40 = L, del cyc 1; Ar 39 = L, del cyc 1; Ar 38 = L; Ar 37 = L, del cyc 1; Ar 36 = L @ ---	Unknown; 600/300; Det. IC= 65.87086	LLLLLLL	1		0	Eurotherm	850	850	0	0	0	29068	19671
	E	925	3.59507	0.0149323	1.16023	11.3823	2.35876	0.439743	0.000582504	8.91727	55.3636	67.1824	8.8549	20742	Unknown; 600/300	nm-108	1.00531	0.00097	1	0		50372-01E	MTK98-060, E3:108	3	1999-08-06	11.6153	3016784000	TW	gmass hawaiite, 199.99 MG	0	Takahe		Macintosh HD:Users:mcintosh:Documents: Atlas Wilch 2019: MBL MS Data:Takahe:MS Data Takahe iso all:MS Lookup Table	7.875	Bs Mult = L; Ar 40 = L; Ar 39 = L; Ar 38 = L; Ar 37 = L; Ar 36 = L; Ar 40 = L, del cyc 1; Ar 39 = L, del cyc 1; Ar 38 = L; Ar 37 = L, del cyc 1; Ar 36 = L @ ---	Unknown; 600/300	LLLLLL	1		0	Eurotherm	925	925	0	0	0	30606	20742
	F	1025	3.91634	0.0175273	1.50883	13.1031	1.08394	0.338146	0.00121867	4.09061	59.7321	33.5811	15.6192	18307	Unknown; Automated furnace analysis ; 600/300	nm-108	1.00531	0.00097	1	0		50372-01F	MTK98-060, E3:108	3	1999-08-06	12.5317	3016788000	TW	gmass hawaiite, 199.99 MG	0	Takahe		Macintosh HD:Users:mcintosh:Documents: Atlas Wilch 2019: MBL MS Data:Takahe:MS Data Takahe iso all:MS Lookup Table	7.875	Bs Mult = L; Ar 40 = L; Ar 39 = L; Ar 38 = L; Ar 37 = L; Ar 36 = L; Ar 40 = L, del cyc 1; Ar 39 = L, del cyc 1; Ar 38 = L; Ar 37 = L, del cyc 1; Ar 36 = L @ ---	Unknown; Automated furnace analysis ; 600/300	LLLLLL	1		0	Eurotherm	1025	1025	0	0	0	28882	18307
	G	1125	4.88903	0.0187517	1.76912	16.72	0.939488	0.288394	0.00137534	1.7203	63.5183	17.6334	18.8388	19858	Unknown; 600/300	nm-108	1.00531	0.00097	1	0		50372-01G	MTK98-060, E3:108	3	1999-08-06	13.0172	3016789000	TW	gmass hawaiite, 199.99 MG	0	Takahe		Macintosh HD:Users:mcintosh:Documents: Atlas Wilch 2019: MBL MS Data:Takahe:MS Data Takahe iso all:MS Lookup Table	7.875	Bs Mult = L; Ar 40 = L; Ar 39 = L; Ar 38 = L; Ar 37 = L; Ar 36 = L; Ar 40 = L, del cyc 1; Ar 39 = L, del cyc 1; Ar 38 = L; Ar 37 = L, del cyc 1; Ar 36 = L @ ---	Unknown; 600/300	LLLLLL	1		0	Eurotherm	1125	1125	0	0	0	29261	19858
	H	1300	10.1312	0.0202939	5.33835	34.8001	8.84158	0.0955734	0.000928946	2.54455	99.1511	54.183	11.5538	20797	Unknown; 600/300; Det. IC= 87.13609	nm-108	1.00531	0.00097	1	0		50372-01H	MTK98-060, E3:108	3	1999-08-06	13.5083	3016791000	TW	gmass hawaiite, 199.99 MG	0	Takahe		Macintosh HD:Users:mcintosh:Documents: Atlas Wilch 2019: MBL MS Data:Takahe:MS Data Takahe iso all:MS Lookup Table	7.875	Bs Mult = L; Bs Far = L; Ar 40 = L; Ar 39 = L; Ar 38 = L; Ar 37 = L; Ar 36 = L @ ---	Unknown; 600/300; Det. IC= 87.13609	LLLLLLL	1		0	Eurotherm	1300	1300	0	0	0	29641	20797
Xi	I	1750	61.5856	0.0509878	7.02035	204.779	0.210634	0.072675	0.000700056	2.61854	100	339.319	111.03	21504	Unknown; 600/300	nm-108	1.00531	0.00097	1	0		50372-01I	MTK98-060, E3:108	3	1999-08-06	14.2167	3016794000	TW	gmass hawaiite, 199.99 MG	0	Takahe		Macintosh HD:Users:mcintosh:Documents: Atlas Wilch 2019: MBL MS Data:Takahe:MS Data Takahe iso all:MS Lookup Table	7.875	Bs Mult = L; Ar 40 = L; Ar 39 = L; Ar 38 = L; Ar 37 = L; Ar 36 = L @ ---	Unknown; 600/300	LLLLLL	1		0	Eurotherm	1750	1750	0	0	0	29297	21504
	Integrated age ± 2s				n=8		24.813	0.187194			K2O=0.41%	59.6015	13.2865			nm-108
	Plateau ± 2s		steps B-H		n=7	MSWD=2.99	24.6024	0.31 ±0.28			99.1511	61.3355	10.489			nm-108
	Isochron±2s		steps B-H		n=7	MSWD=3.62		40Ar/36Ar=		293.5±4.1		67.0352	11.6989
	MTK98-064, E4:108, gmass hawaiite, 200.36 MG, J=0.0001157±0.11%, D=1.00531±0.00097, nm-108, Lab#=50373-01, MAP
X	A	675	357.612	0.243479	1.02255	1207.33	2.65705	0.498955	0.00200027	0.258257	10.0986	192.846	337.537	20267	Unknown; Automated furnace analysis ; 600/300	nm-108	1.00531	0.00097	1	0		50373-01A	MTK98-064, E4:108	3	1999-08-06	15.6547	3016799000	TW	gmass hawaiite, 200.36 MG	0	Takahe		Macintosh HD:Users:mcintosh:Documents: Atlas Wilch 2019: MBL MS Data:Takahe:MS Data Takahe iso all:MS Lookup Table	7.875	Bs Mult = L; Ar 40 = L; Ar 39 = L; Ar 38 = L; Ar 37 = L; Ar 36 = L @ ---	Unknown; Automated furnace analysis ; 600/300	LLLLLL	1		0	Eurotherm	675	675	0	0	0	35985	20267
X	B	750	20.4651	0.0260396	1.27962	67.5523	4.62643	0.398716	0.000755153	2.93961	27.6821	125.644	18.1953	17531	Unknown; 600/300	nm-108	1.00531	0.00097	1	0		50373-01B	MTK98-064, E4:108	3	1999-08-06	16.1364	3016800000	TW	gmass hawaiite, 200.36 MG	0	Takahe		Macintosh HD:Users:mcintosh:Documents: Atlas Wilch 2019: MBL MS Data:Takahe:MS Data Takahe iso all:MS Lookup Table	7.875	Bs Mult = L; Ar 40 = L; Ar 39 = L; Ar 38 = L; Ar 37 = L; Ar 36 = L @ ---	Unknown; 600/300	LLLLLL	1		0	Eurotherm	750	750	0	0	0	29081	17531
	C	800	22.393	0.0269697	1.04988	75.0153	1.9924	0.485965	0.000622251	1.36857	35.2545	63.9956	23.8807	15528	Unknown; Automated furnace analysis ; 600/300	nm-108	1.00531	0.00097	1	0		50373-01C	MTK98-064, E4:108	3	1999-08-06	17.0522	3016804000	TW	gmass hawaiite, 200.36 MG	0	Takahe		Macintosh HD:Users:mcintosh:Documents: Atlas Wilch 2019: MBL MS Data:Takahe:MS Data Takahe iso all:MS Lookup Table	7.875	Bs Mult = L; Ar 40 = L; Ar 39 = L; Ar 38 = L; Ar 37 = L; Ar 36 = L @ ---	Unknown; Automated furnace analysis ; 600/300	LLLLLL	1		0	Eurotherm	800	800	0	0	0	28878	15528
	D	850	20.7395	0.0261852	1.05128	69.3621	3.01745	0.485318	0.000697564	1.56035	46.7228	67.5762	20.074	19047	Unknown; 600/300	nm-108	1.00531	0.00097	1	0		50373-01D	MTK98-064, E4:108	3	1999-08-06	17.5397	3016806000	TW	gmass hawaiite, 200.36 MG	0	Takahe		Macintosh HD:Users:mcintosh:Documents: Atlas Wilch 2019: MBL MS Data:Takahe:MS Data Takahe iso all:MS Lookup Table	7.875	Bs Mult = L; Ar 40 = L; Ar 39 = L; Ar 38 = L; Ar 37 = L; Ar 36 = L @ ---	Unknown; 600/300	LLLLLL	1		0	Eurotherm	850	850	0	0	0	29157	19047
	E	925	18.5428	0.0251421	1.26692	62.139	2.33973	0.402714	0.00078642	1.49883	55.6154	58.0454	19.3778	19705	Unknown; 600/300	nm-108	1.00531	0.00097	1	0		50373-01E	MTK98-064, E4:108	3	1999-08-06	18.0272	3016807000	TW	gmass hawaiite, 200.36 MG	0	Takahe		Macintosh HD:Users:mcintosh:Documents: Atlas Wilch 2019: MBL MS Data:Takahe:MS Data Takahe iso all:MS Lookup Table	7.875	Bs Mult = L; Ar 40 = L; Ar 39 = L; Ar 38 = L; Ar 37 = L; Ar 36 = L @ ---	Unknown; 600/300	LLLLLL	1		0	Eurotherm	925	925	0	0	0	29361	19705
	F	1025	18.3509	0.0237161	1.80069	62.3327	1.1489	0.283338	0.000390683	0.379959	59.982	14.568	22.6013	18289	Unknown; Automated furnace analysis ; 600/300	nm-108	1.00531	0.00097	1	0		50373-01F	MTK98-064, E4:108	3	1999-08-06	19.3675	3016812000	TW	gmass hawaiite, 200.36 MG	0	Takahe		Macintosh HD:Users:mcintosh:Documents: Atlas Wilch 2019: MBL MS Data:Takahe:MS Data Takahe iso all:MS Lookup Table	7.875	Bs Mult = L; Ar 40 = L; Ar 39 = L; Ar 38 = L; Ar 37 = L; Ar 36 = L @ ---	Unknown; Automated furnace analysis ; 600/300	LLLLLL	1		0	Eurotherm	1025	1025	0	0	0	28889	18289
	G	1125	22.3919	0.0289639	1.94579	74.9199	1.14203	0.262209	0.0011971	1.79757	64.3224	84.1048	27.4057	20203	Unknown; 600/300	nm-108	1.00531	0.00097	1	0		50373-01G	MTK98-064, E4:108	3	1999-08-06	19.8572	3016814000	TW	gmass hawaiite, 200.36 MG	0	Takahe		Macintosh HD:Users:mcintosh:Documents: Atlas Wilch 2019: MBL MS Data:Takahe:MS Data Takahe iso all:MS Lookup Table	7.875	Bs Mult = L; Ar 40 = L; Ar 39 = L; Ar 38 = L; Ar 37 = L; Ar 36 = L @ ---	Unknown; 600/300	LLLLLL	1		0	Eurotherm	1125	1125	0	0	0	29824	20203
	H	1300	51.3683	0.0465711	4.84016	174.068	8.78639	0.105411	0.00101173	0.589549	97.7166	63.4078	47.1585	20225	Unknown; 600/300; Det. IC= 83.75526	nm-108	1.00531	0.00097	1	0		50373-01H	MTK98-064, E4:108	3	1999-08-06	20.3461	3016816000	TW	gmass hawaiite, 200.36 MG	0	Takahe		Macintosh HD:Users:mcintosh:Documents: Atlas Wilch 2019: MBL MS Data:Takahe:MS Data Takahe iso all:MS Lookup Table	7.875	Bs Mult = L; Bs Far = L; Ar 40 = L; Ar 39 = L; Ar 38 = L; Ar 37 = L; Ar 36 = L @ ---	Unknown; 600/300; Det. IC= 83.75526	LLLLLLL	1		0	Eurotherm	1300	1300	0	0	0	29092	20225
X	I	1750	98.6051	0.0769166	6.7636	331.777	0.600799	0.0754338	0.00133382	1.09988	100	227.374	96.8014	21724	Unknown; 600/300	nm-108	1.00531	0.00097	1	0		50373-01I	MTK98-064, E4:108	3	1999-08-06	21.0381	3016818000	TW	gmass hawaiite, 200.36 MG	0	Takahe		Macintosh HD:Users:mcintosh:Documents: Atlas Wilch 2019: MBL MS Data:Takahe:MS Data Takahe iso all:MS Lookup Table	7.875	Bs Mult = L; Ar 40 = L; Ar 39 = L; Ar 38 = L; Ar 37 = L; Ar 36 = L @ ---	Unknown; 600/300	LLLLLL	1		0	Eurotherm	1750	1750	0	0	0	29096	21724
	Integrated age ± 2s				n=9		26.3112	0.197966			K2O=0.44%	89.9882	114.112			nm-108
	Plateau ± 2s		steps C-H		n=6	MSWD=0.98	18.4269	0.27 ±0.30			70.0345	56.7367	19.3923			nm-108
	Isochron±2s		steps A-I		n=9	MSWD=2.48		40Ar/36Ar=		296.7±2.0		54.5409	20.845
	MTK98-100, C5, anorthoclase, 3 holes, 51.44, J=0.000118±0.10%, D=1.00531±0.00097, nm-108, Lab#=50363-01, MAP
X	B	2	19.4345	0.0413497	0.143959	36.0962	0.069949	3.54409	0.00660441	45.1748	0.124205	1867.87	236.432	8996	Unknown; Automated laser analysis ; 600/200	nm-108	1.00531	0.00097	1	0		50363-01B	MTK98-100, C5	3	1999-08-02	16.0542	3016455000	TW	anorthoclase, 3 holes, 51.44	0	Mt. Takahe		Macintosh HD:Users:mcintosh:Documents: Atlas Wilch 2019: MBL MS Data:Takahe:MS Data Takahe iso all:MS Lookup Table	7.875	Bs Mult = L; Ar 40 = L; Ar 39 = L; Ar 38 = L; Ar 37 = L; Ar 36 = L; Ar 40 = L, del cyc 1; Ar 39 = L, del cyc 1; Ar 38 = L; Ar 37 = L, del cyc 1; Ar 36 = L; Ar 40 bkgd = Bracketing; Ar 39 bkgd = Bracketing; Ar 38 bkgd = Bracketing; Ar 37 bkgd = Bracketing; Ar 36 bkgd = Bracketing; Ar 40 = P; Ar 39 = P; Ar 38 = L; Ar 37 = L; Ar 36 = L @ ---	Unknown; Automated laser analysis ; 600/200	PPLLLL	1		0	CO2 Laser	2	2	0	0	0	9187	8996
X	C	4	1.81567	0.0133761	0.159677	4.8233	1.62686	3.19522	0.000474677	22.1676	3.01294	85.6742	10.7427	9413	Unknown; 600/200	nm-108	1.00531	0.00097	1	0		50363-01C	MTK98-100, C5	3	1999-08-02	16.6061	3016457000	TW	anorthoclase, 3 holes, 51.44	0	Mt. Takahe		Macintosh HD:Users:mcintosh:Documents: Atlas Wilch 2019: MBL MS Data:Takahe:MS Data Takahe iso all:MS Lookup Table	7.875	Bs Mult = L; Ar 40 = L; Ar 39 = L; Ar 38 = L; Ar 37 = L; Ar 36 = L; Ar 40 = L, del cyc 1; Ar 39 = L, del cyc 1; Ar 38 = L; Ar 37 = L, del cyc 1; Ar 36 = L; Ar 40 bkgd = Bracketing; Ar 39 bkgd = Bracketing; Ar 38 bkgd = Bracketing; Ar 37 bkgd = Bracketing; Ar 36 bkgd = Bracketing; Ar 40 = P; Ar 39 = P; Ar 38 = L; Ar 37 = L; Ar 36 = L @ ---	Unknown; 600/200	PPLLLL	1		0	CO2 Laser	4	4	0	0	0	9914	9413
X	D	6	0.87864	0.0128655	0.164982	1.8614	6.02445	3.09248	0.000486693	38.8238	13.7103	72.6117	4.19724	8988	Unknown; Automated laser analysis ; 600/200	nm-108	1.00531	0.00097	1	0		50363-01D	MTK98-100, C5	3	1999-08-02	17.6625	3016460000	TW	anorthoclase, 3 holes, 51.44	0	Mt. Takahe		Macintosh HD:Users:mcintosh:Documents: Atlas Wilch 2019: MBL MS Data:Takahe:MS Data Takahe iso all:MS Lookup Table	7.875	Bs Mult = L; Ar 40 = L; Ar 39 = L; Ar 38 = L; Ar 37 = L; Ar 36 = L; Ar 40 = L, del cyc 1; Ar 39 = L, del cyc 1; Ar 38 = L; Ar 37 = L, del cyc 1; Ar 36 = L; Ar 40 bkgd = Bracketing; Ar 39 bkgd = Bracketing; Ar 38 bkgd = Bracketing; Ar 37 bkgd = Bracketing; Ar 36 bkgd = Bracketing; Ar 40 = P; Ar 39 = P; Ar 38 = L; Ar 37 = L; Ar 36 = L @ ---	Unknown; Automated laser analysis ; 600/200	PPLLLL	1		0	CO2 Laser	6	6	0	0	0	9177	8988
X	E	8	0.515988	0.0128634	0.169514	1.3853	8.23771	3.00981	0.000510839	23.1603	28.3375	25.4383	2.49838	9093	Unknown; 600/200	nm-108	1.00531	0.00097	1	0		50363-01E	MTK98-100, C5	3	1999-08-02	18.1928	3016462000	TW	anorthoclase, 3 holes, 51.44	0	Mt. Takahe		Macintosh HD:Users:mcintosh:Documents: Atlas Wilch 2019: MBL MS Data:Takahe:MS Data Takahe iso all:MS Lookup Table	7.875	Bs Mult = L; Ar 40 = L; Ar 39 = L; Ar 38 = L; Ar 37 = L; Ar 36 = L; Ar 40 = L, del cyc 1; Ar 39 = L, del cyc 1; Ar 38 = L; Ar 37 = L, del cyc 1; Ar 36 = L; Ar 40 bkgd = Bracketing; Ar 39 bkgd = Bracketing; Ar 38 bkgd = Bracketing; Ar 37 bkgd = Bracketing; Ar 36 bkgd = Bracketing; Ar 40 = P; Ar 39 = P; Ar 38 = L; Ar 37 = L; Ar 36 = L @ ---	Unknown; 600/200	PPLLLL	1		0	CO2 Laser	8	8	0	0	0	9597	9093
X	F	10	0.645735	0.0131674	0.173252	1.3225	9.96055	2.94486	0.000598369	41.5187	46.024	57.0689	2.25456	10103	Unknown; 600/200	nm-108	1.00531	0.00097	1	0		50363-01F	MTK98-100, C5	3	1999-08-02	18.6936	3016464000	TW	anorthoclase, 3 holes, 51.44	0	Mt. Takahe		Macintosh HD:Users:mcintosh:Documents: Atlas Wilch 2019: MBL MS Data:Takahe:MS Data Takahe iso all:MS Lookup Table	7.875	Bs Mult = L; Ar 40 = L; Ar 39 = L; Ar 38 = L; Ar 37 = L; Ar 36 = L; Ar 40 = L, del cyc 1; Ar 39 = L, del cyc 1; Ar 38 = L; Ar 37 = L, del cyc 1; Ar 36 = L; Ar 40 bkgd = Bracketing; Ar 39 bkgd = Bracketing; Ar 38 bkgd = Bracketing; Ar 37 bkgd = Bracketing; Ar 36 bkgd = Bracketing; Ar 40 = P; Ar 39 = P; Ar 38 = L; Ar 37 = L; Ar 36 = L @ ---	Unknown; 600/200	PPLLLL	1		0	CO2 Laser	10	10	0	0	0	10833	10103
X	G	12	0.471987	0.0137583	0.177221	1.0539	6.33719	2.87892	0.000776041	36.876	57.2766	37.0493	3.17841	9325	Unknown; 600/200	nm-108	1.00531	0.00097	1	0		50363-01G	MTK98-100, C5	3	1999-08-02	19.1953	3016466000	TW	anorthoclase, 3 holes, 51.44	0	Mt. Takahe		Macintosh HD:Users:mcintosh:Documents: Atlas Wilch 2019: MBL MS Data:Takahe:MS Data Takahe iso all:MS Lookup Table	7.875	Bs Mult = L; Ar 40 = L; Ar 39 = L; Ar 38 = L; Ar 37 = L; Ar 36 = L; Ar 40 = L, del cyc 1; Ar 39 = L, del cyc 1; Ar 38 = L; Ar 37 = L, del cyc 1; Ar 36 = L; Ar 40 bkgd = Bracketing; Ar 39 bkgd = Bracketing; Ar 38 bkgd = Bracketing; Ar 37 bkgd = Bracketing; Ar 36 bkgd = Bracketing; Ar 40 = P; Ar 39 = P; Ar 38 = L; Ar 37 = L; Ar 36 = L @ ---	Unknown; 600/200	PPLLLL	1		0	CO2 Laser	12	12	0	0	0	9821	9325
X	H	14	0.219614	0.0130791	0.17099	0.3097	3.7019	2.98382	0.000626319	64.2464	63.8499	30.0341	4.56575	8989	Unknown; Automated laser analysis ; 600/200	nm-108	1.00531	0.00097	1	0		50363-01H	MTK98-100, C5	3	1999-08-02	19.8967	3016468000	TW	anorthoclase, 3 holes, 51.44	0	Mt. Takahe		Macintosh HD:Users:mcintosh:Documents: Atlas Wilch 2019: MBL MS Data:Takahe:MS Data Takahe iso all:MS Lookup Table	7.875	Bs Mult = L; Ar 40 = L; Ar 39 = L; Ar 38 = L; Ar 37 = L; Ar 36 = L; Ar 40 = L, del cyc 1; Ar 39 = L, del cyc 1; Ar 38 = L; Ar 37 = L, del cyc 1; Ar 36 = L; Ar 40 bkgd = Bracketing; Ar 39 bkgd = Bracketing; Ar 38 bkgd = Bracketing; Ar 37 bkgd = Bracketing; Ar 36 bkgd = Bracketing; Ar 40 = P; Ar 39 = P; Ar 38 = L; Ar 37 = L; Ar 36 = L @ ---	Unknown; Automated laser analysis ; 600/200	PPLLLL	1		0	CO2 Laser	14	14	0	0	0	9179	8989
X	I	25	0.518853	0.0126099	0.176931	1.3213	6.94972	2.88363	0.000444043	27.336	76.1902	30.1915	3.02254	9396	Unknown; 600/200	nm-108	1.00531	0.00097	1	0		50363-01I	MTK98-100, C5	3	1999-08-02	20.4392	3016470000	TW	anorthoclase, 3 holes, 51.44	0	Mt. Takahe		Macintosh HD:Users:mcintosh:Documents: Atlas Wilch 2019: MBL MS Data:Takahe:MS Data Takahe iso all:MS Lookup Table	7.875	Bs Mult = L; Ar 40 = L; Ar 39 = L; Ar 38 = L; Ar 37 = L; Ar 36 = L; Ar 40 = L, del cyc 1; Ar 39 = L, del cyc 1; Ar 38 = L; Ar 37 = L, del cyc 1; Ar 36 = L; Ar 40 bkgd = Bracketing; Ar 39 bkgd = Bracketing; Ar 38 bkgd = Bracketing; Ar 37 bkgd = Bracketing; Ar 36 bkgd = Bracketing; Ar 40 = P; Ar 39 = P; Ar 38 = L; Ar 37 = L; Ar 36 = L @ ---	Unknown; 600/200	PPLLLL	1		0	CO2 Laser	25	25	0	0	0	9889	9396
	J	45	0.474398	0.0128984	0.181101	1.3947	13.4091	2.81723	0.000520233	16.0249	100	16.1826	1.7471	9313	Unknown; 600/200	nm-108	1.00531	0.00097	1	0		50363-01J	MTK98-100, C5	3	1999-08-02	20.9308	3016472000	TW	anorthoclase, 3 holes, 51.44	0	Mt. Takahe		Macintosh HD:Users:mcintosh:Documents: Atlas Wilch 2019: MBL MS Data:Takahe:MS Data Takahe iso all:MS Lookup Table	7.875	Bs Mult = L; Ar 40 = L; Ar 39 = L; Ar 38 = L; Ar 37 = L; Ar 36 = L; Ar 40 = L, del cyc 1; Ar 39 = L, del cyc 1; Ar 38 = L; Ar 37 = L, del cyc 1; Ar 36 = L; Ar 40 bkgd = Bracketing; Ar 39 bkgd = Bracketing; Ar 38 bkgd = Bracketing; Ar 37 bkgd = Bracketing; Ar 36 bkgd = Bracketing; Ar 40 = P; Ar 39 = P; Ar 38 = L; Ar 37 = L; Ar 36 = L @ ---	Unknown; 600/200	PPLLLL	1		0	CO2 Laser	45	45	0	0	0	10046	9313
	Integrated age ± 2s				n=9		56.3174	2.93231				39.9612	2.35466			nm-108
	Plateau ± 2s		steps I-J		n=2	MSWD=16.10	20.3588	2.840±0.094			36.1501	19.6909	12.1393			nm-108
	Isochron±2s		steps B-J		n=9	MSWD=24.66		40Ar/36Ar=		477.0±36.8		-15.8313	2.64136
	MTK98-100, C5:108, anorthoclase, 15.8 mg, J=0.000118±0.10%, D=1.00531±0.00097, NM-108, Lab#=50363-05, MAP
Xi	B	3	6.35903	0.0121072	0.258481	10.1763	0.0207967	1.97386	-0.000152492	53.02	0.315656	717.594	299.841	3006	Unknown; Automated laser analysis ; 480/200	NM-108	1.00531	0.00097	1	0		50363-05B	MTK98-100, C5:108	3	1999-08-21	6.36389	3018061000	wcm	anorthoclase, 15.8 mg	0	Takahe		Macintosh HD:Users:mcintosh:Documents: Atlas Wilch 2019: MBL MS Data:Takahe:MS Data Takahe iso all:MS Lookup Table	7.875	Bs Mult = L; Ar 40 = L; Ar 39 = L; Ar 38 = L; Ar 37 = L; Ar 36 = L @ ---	Unknown; Automated laser analysis ; 480/200	LLLLLL	1		0	CO2 Laser	3	3	0	0	0	3196	3006
	C	12	0.672073	0.0141619	0.187783	1.8886	2.35628	2.71698	0.000844799	19.0933	36.0797	27.3153	3.45427	3004	Unknown; Automated laser analysis ; 480/200	NM-108	1.00531	0.00097	1	0		50363-05C	MTK98-100, C5:108	3	1999-08-21	7.1525	3018064000	wcm	anorthoclase, 15.8 mg	0	Takahe		Macintosh HD:Users:mcintosh:Documents: Atlas Wilch 2019: MBL MS Data:Takahe:MS Data Takahe iso all:MS Lookup Table	7.875	Bs Mult = L; Ar 40 = L; Ar 39 = L; Ar 38 = L; Ar 37 = L; Ar 36 = L @ ---	Unknown; Automated laser analysis ; 480/200	LLLLLL	1		0	CO2 Laser	12	12	0	0	0	3193	3004
	D	40	0.925849	0.0139253	0.195688	2.8204	3.22086	2.60723	0.000731126	11.5935	84.9664	22.849	3.13253	3005	Unknown; Automated laser analysis ; 480/200	NM-108	1.00531	0.00097	1	0		50363-05D	MTK98-100, C5:108	3	1999-08-21	7.93389	3018067000	wcm	anorthoclase, 15.8 mg	0	Takahe		Macintosh HD:Users:mcintosh:Documents: Atlas Wilch 2019: MBL MS Data:Takahe:MS Data Takahe iso all:MS Lookup Table	7.875	Bs Mult = L; Ar 40 = L; Ar 39 = L; Ar 38 = L; Ar 37 = L; Ar 36 = L @ ---	Unknown; Automated laser analysis ; 480/200	LLLLLL	1		0	CO2 Laser	40	40	0	0	0	3193	3005
	E	45	0.576755	0.0148027	0.192269	1.5828	0.990475	2.6536	0.00103823	21.4532	100	26.3387	6.44403	3006	Unknown; Automated laser analysis ; 480/200	NM-108	1.00531	0.00097	1	0		50363-05E	MTK98-100, C5:108	3	1999-08-21	8.64056	3018070000	wcm	anorthoclase, 15.8 mg	0	Takahe		Macintosh HD:Users:mcintosh:Documents: Atlas Wilch 2019: MBL MS Data:Takahe:MS Data Takahe iso all:MS Lookup Table	7.875	Bs Mult = L; Ar 40 = L; Ar 39 = L; Ar 38 = L; Ar 37 = L; Ar 36 = L @ ---	Unknown; Automated laser analysis ; 480/200	LLLLLL	1		0	CO2 Laser	45	45	0	0	0	3195	3006
	Integrated age ± 2s				n=4		6.58841	2.64979			K2O=1.36%	27.1375	4.87308			NM-108
	Plateau ± 2s		steps C-E		n=3	MSWD=0.48	6.56761	2.7 ±0.1			99.6843	22.849	3.13253			NM-108
	Isochron±2s		steps C-E		n=3	MSWD=0.11		40Ar/36Ar=		276.8±37.9		34.0216	18.5663
	MTK98-100, C5:108, anorthoclase, 18.1 mg, J=0.000118±0.10%, D=1.00531±0.00097, NM-108, Lab#=50363-06, MAP
X	B	3	8.22499	0.0318587	0.205268	14.4527	0.0371034	2.48555	0.00509716	48.2724	0.448551	844.989	175.385	3005	Unknown; Automated laser analysis ; 480/200	NM-108	1.00531	0.00097	1	0		50363-06B	MTK98-100, C5:108	3	1999-08-21	9.78778	3018074000	wcm	anorthoclase, 18.1 mg	0	Takahe		Macintosh HD:Users:mcintosh:Documents: Atlas Wilch 2019: MBL MS Data:Takahe:MS Data Takahe iso all:MS Lookup Table	7.875	Bs Mult = L; Ar 40 = L; Ar 39 = L; Ar 38 = L; Ar 37 = L; Ar 36 = L @ ---	Unknown; Automated laser analysis ; 480/200	LLLLLL	1		0	CO2 Laser	3	3	0	0	0	3194	3005
X	C	12	0.884394	0.0133458	0.196714	2.116	3.69986	2.59364	0.000607076	30.9934	45.1769	58.3477	2.73543	3005	Unknown; Automated laser analysis ; 480/200	NM-108	1.00531	0.00097	1	0		50363-06C	MTK98-100, C5:108	3	1999-08-21	10.5569	3018076000	wcm	anorthoclase, 18.1 mg	0	Takahe		Macintosh HD:Users:mcintosh:Documents: Atlas Wilch 2019: MBL MS Data:Takahe:MS Data Takahe iso all:MS Lookup Table	7.875	Bs Mult = L; Ar 40 = L; Ar 39 = L; Ar 38 = L; Ar 37 = L; Ar 36 = L @ ---	Unknown; Automated laser analysis ; 480/200	LLLLLL	1		0	CO2 Laser	12	12	0	0	0	3194	3005
	D	40	0.529693	0.0139568	0.201529	1.5623	4.05645	2.53167	0.000805098	15.747	94.2161	17.7557	1.9844	3005	Unknown; Automated laser analysis ; 480/200	NM-108	1.00531	0.00097	1	0		50363-06D	MTK98-100, C5:108	3	1999-08-21	11.3136	3018079000	wcm	anorthoclase, 18.1 mg	0	Takahe		Macintosh HD:Users:mcintosh:Documents: Atlas Wilch 2019: MBL MS Data:Takahe:MS Data Takahe iso all:MS Lookup Table	7.875	Bs Mult = L; Ar 40 = L; Ar 39 = L; Ar 38 = L; Ar 37 = L; Ar 36 = L @ ---	Unknown; Automated laser analysis ; 480/200	LLLLLL	1		0	CO2 Laser	40	40	0	0	0	3195	3005
	E	45	0.240146	0.0136398	0.196916	0.5909	0.478438	2.59098	0.000767507	33.5399	100	17.1455	16.3248	3007	Unknown; Automated laser analysis ; 480/200	NM-108	1.00531	0.00097	1	0		50363-06E	MTK98-100, C5:108	3	1999-08-21	12.0642	3018082000	wcm	anorthoclase, 18.1 mg	0	Takahe		Macintosh HD:Users:mcintosh:Documents: Atlas Wilch 2019: MBL MS Data:Takahe:MS Data Takahe iso all:MS Lookup Table	7.875	Bs Mult = L; Ar 40 = L; Ar 39 = L; Ar 38 = L; Ar 37 = L; Ar 36 = L @ ---	Unknown; Automated laser analysis ; 480/200	LLLLLL	1		0	CO2 Laser	45	45	0	0	0	3196	3007
	Integrated age ± 2s				n=4		8.27185	2.56222			K2O=1.49%	39.5789	4.0533			NM-108
	Plateau ± 2s		steps D-E		n=2	MSWD=0.00	4.53489	2.538±0.084			54.8231	17.7468	3.93997			NM-108
	Isochron±2s		steps B-E		n=4	MSWD=1.88		40Ar/36Ar=		612.1±98.7		-82.3554	34.8295
	MTK98-100, C5:108, anorthoclase, 18.9 mg, J=0.000118±0.10%, D=1.00531±0.00097, NM-108, Lab#=50363-07, MAP
X	B	3	4.37534	0.0279747	0.173423	14.114	0.0446121	2.94196	0.00403808	4.9885	0.59743	46.4606	177.18	3004	Unknown; Automated laser analysis ; 480/200	NM-108	1.00531	0.00097	1	0		50363-07B	MTK98-100, C5:108	3	1999-08-21	13.2811	3018086000	wcm	anorthoclase, 18.9 mg	0	Takahe		Macintosh HD:Users:mcintosh:Documents: Atlas Wilch 2019: MBL MS Data:Takahe:MS Data Takahe iso all:MS Lookup Table	7.875	Bs Mult = L; Ar 40 = L; Ar 39 = L; Ar 38 = L; Ar 37 = L; Ar 36 = L @ ---	Unknown; Automated laser analysis ; 480/200	LLLLLL	1		0	CO2 Laser	3	3	0	0	0	3193	3004
X	C	12	0.631404	0.0139653	0.186414	1.6632	3.51432	2.73694	0.000801983	24.4138	47.6599	32.8134	2.91382	3004	Unknown; Automated laser analysis ; 480/200	NM-108	1.00531	0.00097	1	0		50363-07C	MTK98-100, C5:108	3	1999-08-21	14.0517	3018089000	wcm	anorthoclase, 18.9 mg	0	Takahe		Macintosh HD:Users:mcintosh:Documents: Atlas Wilch 2019: MBL MS Data:Takahe:MS Data Takahe iso all:MS Lookup Table	7.875	Bs Mult = L; Ar 40 = L; Ar 39 = L; Ar 38 = L; Ar 37 = L; Ar 36 = L @ ---	Unknown; Automated laser analysis ; 480/200	LLLLLL	1		0	CO2 Laser	12	12	0	0	0	3192	3004
	D	40	0.790908	0.0143265	0.196182	2.4382	3.24171	2.60067	0.000862074	10.7972	91.0717	18.1781	2.96819	3004	Unknown; Automated laser analysis ; 480/200	NM-108	1.00531	0.00097	1	0		50363-07D	MTK98-100, C5:108	3	1999-08-21	14.8142	3018092000	wcm	anorthoclase, 18.9 mg	0	Takahe		Macintosh HD:Users:mcintosh:Documents: Atlas Wilch 2019: MBL MS Data:Takahe:MS Data Takahe iso all:MS Lookup Table	7.875	Bs Mult = L; Ar 40 = L; Ar 39 = L; Ar 38 = L; Ar 37 = L; Ar 36 = L @ ---	Unknown; Automated laser analysis ; 480/200	LLLLLL	1		0	CO2 Laser	40	40	0	0	0	3194	3004
	E	45	0.560992	0.0154461	0.182107	1.1499	0.666703	2.80167	0.00123873	41.9158	100	50.0541	12.1844	3005	Unknown; Automated laser analysis ; 480/200	NM-108	1.00531	0.00097	1	0		50363-07E	MTK98-100, C5:108	3	1999-08-21	15.5567	3018094000	wcm	anorthoclase, 18.9 mg	0	Takahe		Macintosh HD:Users:mcintosh:Documents: Atlas Wilch 2019: MBL MS Data:Takahe:MS Data Takahe iso all:MS Lookup Table	7.875	Bs Mult = L; Ar 40 = L; Ar 39 = L; Ar 38 = L; Ar 37 = L; Ar 36 = L @ ---	Unknown; Automated laser analysis ; 480/200	LLLLLL	1		0	CO2 Laser	45	45	0	0	0	3194	3005
	Integrated age ± 2s				n=4		7.46734	2.68255			K2O=1.29%	28.0654	4.91325			NM-108
	Plateau ± 2s		steps D-E		n=2	MSWD=6.46	3.90841	2.635±0.284			52.3401	19.9638	14.6604			NM-108
	Isochron±2s		steps B-E		n=4	MSWD=2.16		40Ar/36Ar=		217.6±33.8		58.9924	13.4108
	MTK98-103, F2:108, anorth, 39.2 mg, J=0.0001182±0.10%, D=1.00531±0.00097, nm-108, Lab#=50377-01, MAP
	C	6	0.738891	0.0122539	0.154917	2.1742	1.63738	3.2934	0.000300902	14.6363	8.64594	23.0657	5.04758	8539	Unknown; Automated laser analysis ; 600/200	nm-108	1.00531	0.00097	1	0		50377-01C	MTK98-103, F2:108	3	1999-08-08	6.98111	3016940000	TW	anorth, 39.2 mg	0	Mt. Takahe		Macintosh HD:Users:mcintosh:Documents: Atlas Wilch 2019: MBL MS Data:Takahe:MS Data Takahe iso all:MS Lookup Table	7.875	Bs Mult = L; Ar 40 = L; Ar 39 = L; Ar 38 = L; Ar 37 = L; Ar 36 = L; Ar 40 = L, del cyc 1 2; Ar 39 = L, del cyc 1 2; Ar 38 = L; Ar 37 = L, del cyc 1 2; Ar 36 = L; Ar 40 = P; Ar 39 = P; Ar 38 = L; Ar 37 = L; Ar 36 = L @ ---	Unknown; Automated laser analysis ; 600/200	PPLLLL	1		0	CO2 Laser	6	6	0	0	0	8727	8539
	D	9	0.438087	0.0128253	0.166462	1.2594	4.20047	3.065	0.000506755	17.9366	30.8258	16.7595	2.02274	8550	Unknown; Automated laser analysis ; 600/200	nm-108	1.00531	0.00097	1	0		50377-01D	MTK98-103, F2:108	3	1999-08-08	7.54083	3016942000	TW	anortho, 39.2 mg	0	Mt. Takahe		Macintosh HD:Users:mcintosh:Documents: Atlas Wilch 2019: MBL MS Data:Takahe:MS Data Takahe iso all:MS Lookup Table	7.875	Bs Mult = L; Ar 40 = L; Ar 39 = L; Ar 38 = L; Ar 37 = L; Ar 36 = L; Ar 40 = L, del cyc 1 2; Ar 39 = L, del cyc 1 2; Ar 38 = L; Ar 37 = L, del cyc 1 2; Ar 36 = L; Ar 40 = P; Ar 39 = P; Ar 38 = L; Ar 37 = L; Ar 36 = L @ ---	Unknown; Automated laser analysis ; 600/200	PPLLLL	1		0	CO2 Laser	9	9	0	0	0	8738	8550
	E	12	0.372565	0.0131677	0.170656	1.0831	3.17405	2.98967	0.000610808	17.5753	47.5859	13.9659	2.47579	8539	Unknown; Automated laser analysis ; 600/200	nm-108	1.00531	0.00097	1	0		50377-01E	MTK98-103, F2:108	3	1999-08-08	8.25833	3016945000	TW	anorth, 39.2 mg	0	Mt. Takahe		Macintosh HD:Users:mcintosh:Documents: Atlas Wilch 2019: MBL MS Data:Takahe:MS Data Takahe iso all:MS Lookup Table	7.875	Bs Mult = L; Ar 40 = L; Ar 39 = L; Ar 38 = L; Ar 37 = L; Ar 36 = L; Ar 40 = L, del cyc 1; Ar 39 = L, del cyc 1; Ar 38 = L; Ar 37 = L, del cyc 1; Ar 36 = L; Ar 40 = P; Ar 39 = P; Ar 38 = L; Ar 37 = L; Ar 36 = L @ ---	Unknown; Automated laser analysis ; 600/200	PPLLLL	1		0	CO2 Laser	12	12	0	0	0	8729	8539
	F	15	0.369393	0.0134735	0.167066	1.0222	2.11895	3.05392	0.00069862	21.6624	58.7747	17.067	3.60127	8539	Unknown; Automated laser analysis ; 600/200	nm-108	1.00531	0.00097	1	0		50377-01F	MTK98-103, F2:108	3	1999-08-08	8.80639	3016947000	TW	anorth, 39.2 mg	0	Mt. Takahe		Macintosh HD:Users:mcintosh:Documents: Atlas Wilch 2019: MBL MS Data:Takahe:MS Data Takahe iso all:MS Lookup Table	7.875	Bs Mult = L; Ar 40 = L; Ar 39 = L; Ar 38 = L; Ar 37 = L; Ar 36 = L; Ar 40 = L, del cyc 1; Ar 39 = L, del cyc 1; Ar 38 = L; Ar 37 = L, del cyc 1; Ar 36 = L; Ar 40 = P; Ar 39 = P; Ar 38 = L; Ar 37 = L; Ar 36 = L @ ---	Unknown; Automated laser analysis ; 600/200	PPLLLL	1		0	CO2 Laser	15	15	0	0	0	8727	8539
Xi	G	25	0.653175	0.0122643	0.1805	1.3115	3.59534	2.82662	0.000348864	42.7638	77.7594	59.5754	2.42839	8552	Unknown; Automated laser analysis ; 600/200	nm-108	1.00531	0.00097	1	0		50377-01G	MTK98-103, F2:108	3	1999-08-08	9.57222	3016950000	TW	anorth, 39.2 mg	0	Mt. Takahe		Macintosh HD:Users:mcintosh:Documents: Atlas Wilch 2019: MBL MS Data:Takahe:MS Data Takahe iso all:MS Lookup Table	7.875	Bs Mult = L; Ar 40 = L; Ar 39 = L; Ar 38 = L; Ar 37 = L; Ar 36 = L; Ar 40 = L, del cyc 1 2; Ar 39 = L, del cyc 1 2; Ar 38 = L; Ar 37 = L, del cyc 1 2; Ar 36 = L; Ar 40 = P; Ar 39 = P; Ar 38 = L; Ar 37 = L; Ar 36 = L @ ---	Unknown; Automated laser analysis ; 600/200	PPLLLL	1		0	CO2 Laser	25	25	0	0	0	8742	8552
X	H	45	0.304484	0.0130277	0.183814	0.7833	4.21197	2.77566	0.000587759	28.5676	100	18.5526	1.56729	8539	Unknown; Automated laser analysis ; 600/200	nm-108	1.00531	0.00097	1	0		50377-01H	MTK98-103, F2:108	3	1999-08-08	10.1106	3016952000	TW	anorth, 39.2 mg	0	Mt. Takahe		Macintosh HD:Users:mcintosh:Documents: Atlas Wilch 2019: MBL MS Data:Takahe:MS Data Takahe iso all:MS Lookup Table	7.875	Bs Mult = L; Ar 40 = L; Ar 39 = L; Ar 38 = L; Ar 37 = L; Ar 36 = L; Ar 40 = L, del cyc 1 2; Ar 39 = L, del cyc 1 2; Ar 38 = L; Ar 37 = L, del cyc 1 2; Ar 36 = L; Ar 40 = P; Ar 39 = P; Ar 38 = L; Ar 37 = L; Ar 36 = L @ ---	Unknown; Automated laser analysis ; 600/200	PPLLLL	1		0	CO2 Laser	45	45	0	0	0	8727	8539
	Integrated age ± 2s				n=6		18.9382	2.95755			K2O=1.57%	25.1256	2.18778			nm-108
	Plateau ± 2s		steps C-F		n=4	MSWD=0.93	11.1309	3.1 ±0.3			58.7747	16.4073	2.76333			nm-108
	Isochron±2s		steps C-H		n=5	MSWD=1.23		40Ar/36Ar=		302.1±31.8		15.9626	6.26464
	MTK98-110, J1:108, anorthoclase, 33.01 mg, J=0.0001179±0.10%, D=1.00531±0.00097, nm-108, Lab#=50389-01, MAP
X	A	1	22.5284	0.0208849	0.0724769	-5.4398	0.0239174	7.03954	0.0030848	107.16	0.16482	5128.58	466.89	8519	Unknown; Automated laser analysis ; 600/200	nm-108	1.00531	0.00097	1	0		50389-01A	MTK98-110, J1:108	3	1999-08-11	1.26139	3017179000	TW	anorthoclase, 33.01 mg	0	Mt. Takahe		Macintosh HD:Users:mcintosh:Documents: Atlas Wilch 2019: MBL MS Data:Takahe:MS Data Takahe iso all:MS Lookup Table	7.875	Bs Mult = L; Ar 40 = L; Ar 39 = L; Ar 38 = L; Ar 37 = L; Ar 36 = L; Ar 40 = L, del cyc 1 2; Ar 39 = L, del cyc 1 2; Ar 38 = L; Ar 37 = L; Ar 36 = L @ ---	Unknown; Automated laser analysis ; 600/200	LLLLLL	1		0	CO2 Laser	1	1	0	0	0	8709	8519
X	B	3	6.84214	0.0206971	0.169992	6.0144	0.199027	3.00133	0.00244132	74.2164	1.53636	1080.04	52.5564	8527	Unknown; Automated laser analysis ; 600/200	nm-108	1.00531	0.00097	1	0		50389-01B	MTK98-110, J1:108	3	1999-08-11	1.88972	3017181000	TW	anorthoclase, 33.01 mg	0	Mt. Takahe		Macintosh HD:Users:mcintosh:Documents: Atlas Wilch 2019: MBL MS Data:Takahe:MS Data Takahe iso all:MS Lookup Table	7.875	Bs Mult = L; Ar 40 = L; Ar 39 = L; Ar 38 = L; Ar 37 = L; Ar 36 = L; Ar 40 = L, del cyc 1 2 3; Ar 39 = L, del cyc 1 2 3; Ar 38 = L, del cyc 3; Ar 37 = L, del cyc 3; Ar 36 = L, del cyc 3; Ar 40 = L, del cyc 1 2 3; Ar 39 = L, del cyc 1 2 3; Ar 38 = L, del cyc 1 2 3; Ar 37 = L, del cyc 1 2 3; Ar 36 = L, del cyc 1 2 3 @ ---	Unknown; Automated laser analysis ; 600/200	LLLLLL	1		0	CO2 Laser	3	3	0	0	0	8718	8527
X	C	6	0.52469	0.0144109	0.201019	0.754	2.26842	2.53809	0.000972751	60.4571	17.1685	67.4887	3.32361	8532	Unknown; Automated laser analysis ; 600/200	nm-108	1.00531	0.00097	1	0		50389-01C	MTK98-110, J1:108	3	1999-08-11	2.7	3017184000	TW	anorthoclase, 33.01 mg	0	Mt. Takahe		Macintosh HD:Users:mcintosh:Documents: Atlas Wilch 2019: MBL MS Data:Takahe:MS Data Takahe iso all:MS Lookup Table	7.875	Bs Mult = L; Ar 40 = L; Ar 39 = L; Ar 38 = L; Ar 37 = L; Ar 36 = L; Ar 40 = L, del cyc 1 2; Ar 39 = L, del cyc 1 2; Ar 38 = L; Ar 37 = L; Ar 36 = L @ ---	Unknown; Automated laser analysis ; 600/200	LLLLLL	1		0	CO2 Laser	6	6	0	0	0	8720	8532
	D	9	0.282227	0.0141177	0.19942	0.4095	4.25979	2.55844	0.000909338	62.5104	46.5236	37.5349	1.89104	8523	Unknown; Automated laser analysis ; 600/200	nm-108	1.00531	0.00097	1	0		50389-01D	MTK98-110, J1:108	3	1999-08-11	3.25195	3017186000	TW	anorthoclase, 33.01 mg	0	Mt. Takahe		Macintosh HD:Users:mcintosh:Documents: Atlas Wilch 2019: MBL MS Data:Takahe:MS Data Takahe iso all:MS Lookup Table	7.875	Bs Mult = L; Ar 40 = L; Ar 39 = L; Ar 38 = L; Ar 37 = L; Ar 36 = L; Ar 40 = L, del cyc 1; Ar 39 = L, del cyc 1; Ar 38 = L; Ar 37 = L; Ar 36 = L @ ---	Unknown; Automated laser analysis ; 600/200	LLLLLL	1		0	CO2 Laser	9	9	0	0	0	8711	8523
	E	12	0.381736	0.0137647	0.202533	0.5519	3.22952	2.51911	0.000804219	61.3232	68.779	49.8048	3.22035	8522	Unknown; Automated laser analysis ; 600/200	nm-108	1.00531	0.00097	1	0		50389-01E	MTK98-110, J1:108	3	1999-08-11	4.01889	3017189000	TW	anorthoclase, 33.01 mg	0	Mt. Takahe		Macintosh HD:Users:mcintosh:Documents: Atlas Wilch 2019: MBL MS Data:Takahe:MS Data Takahe iso all:MS Lookup Table	7.875	Bs Mult = L; Ar 40 = L; Ar 39 = L; Ar 38 = L; Ar 37 = L; Ar 36 = L; Ar 40 = L, del cyc 1 2; Ar 39 = L, del cyc 1 2; Ar 38 = L; Ar 37 = L; Ar 36 = L @ ---	Unknown; Automated laser analysis ; 600/200	LLLLLL	1		0	CO2 Laser	12	12	0	0	0	8711	8522
X	F	15	0.53703	0.0142509	0.205368	0.5054	1.74213	2.48434	0.00094137	75.1075	80.7843	85.8148	5.91766	8512	Unknown; Automated laser analysis ; 600/200	nm-108	1.00531	0.00097	1	0		50389-01F	MTK98-110, J1:108	3	1999-08-11	4.56694	3017191000	TW	anorthoclase, 33.01 mg	0	Mt. Takahe		Macintosh HD:Users:mcintosh:Documents: Atlas Wilch 2019: MBL MS Data:Takahe:MS Data Takahe iso all:MS Lookup Table	7.875	Bs Mult = L; Ar 40 = L; Ar 39 = L; Ar 38 = L; Ar 37 = L; Ar 36 = L; Ar 40 = L, del cyc 1 2; Ar 39 = L, del cyc 1 2; Ar 38 = L; Ar 37 = L; Ar 36 = L @ ---	Unknown; Automated laser analysis ; 600/200	LLLLLL	1		0	CO2 Laser	15	15	0	0	0	8702	8512
X	G	25	0.940121	0.0152949	0.203805	0.9462	0.980599	2.5034	0.00120775	71.9168	87.5419	143.842	9.12322	8523	Unknown; Automated laser analysis ; 600/200	nm-108	1.00531	0.00097	1	0		50389-01G	MTK98-110, J1:108	3	1999-08-11	5.36555	3017194000	TW	anorthoclase, 33.01 mg	0	Mt. Takahe		Macintosh HD:Users:mcintosh:Documents: Atlas Wilch 2019: MBL MS Data:Takahe:MS Data Takahe iso all:MS Lookup Table	7.875	Bs Mult = L; Ar 40 = L; Ar 39 = L; Ar 38 = L; Ar 37 = L; Ar 36 = L; Ar 40 = L, del cyc 1 2; Ar 39 = L, del cyc 1 2; Ar 38 = L; Ar 37 = L; Ar 36 = L @ ---	Unknown; Automated laser analysis ; 600/200	LLLLLL	1		0	CO2 Laser	25	25	0	0	0	8712	8523
X	H	45	0.227721	0.0152423	0.195276	0.2752	1.80783	2.61273	0.00122778	70.8381	100	34.3205	4.94586	8514	Unknown; Automated laser analysis ; 600/200	nm-108	1.00531	0.00097	1	0		50389-01H	MTK98-110, J1:108	3	1999-08-11	5.92833	3017196000	TW	anorthoclase, 33.01 mg	0	Mt. Takahe		Macintosh HD:Users:mcintosh:Documents: Atlas Wilch 2019: MBL MS Data:Takahe:MS Data Takahe iso all:MS Lookup Table	7.875	Bs Mult = L; Ar 40 = L; Ar 39 = L; Ar 38 = L; Ar 37 = L; Ar 36 = L; Ar 40 = L, del cyc 1; Ar 39 = L, del cyc 1; Ar 38 = L; Ar 37 = L; Ar 36 = L @ ---	Unknown; Automated laser analysis ; 600/200	LLLLLL	1		0	CO2 Laser	45	45	0	0	0	8704	8514
	Integrated age ± 2s				n=8		14.5112	2.54825			K2O=1.43%	81.8684	3.8146			nm-108
	Plateau ± 2s		steps D-E		n=2	MSWD=10.79	7.48931	2.541±0.056			51.6104	40.6809	10.7156			nm-108
	Isochron±2s		steps A-H		n=8	MSWD=3.95		40Ar/36Ar=		1223.2±276.3		-38.848	17.8084
	MTK98-113, D1:108, anorthoclase 163.85 mg, J=0.0001171±0.10%, D=1.00531±0.00097, nm-108, Lab#=50365-01, MAP
X	B	750	6.48513	0.0155259	0.170958	21.4743	1.66305	2.98438	0.000208146	2.35053	1.19204	32.205	25.8142	23838	Unknown; 600/300	nm-108	1.00531	0.00097	1	0		50365-01B	MTK98-113, D1:108	3	1999-08-01	21.1028	3016386000	TW	anorthoclase 163.85 mg	0	Takahe		Macintosh HD:Users:mcintosh:Documents: Atlas Wilch 2019: MBL MS Data:Takahe:MS Data Takahe iso all:MS Lookup Table	7.875	Bs Mult = L; Ar 40 = L; Ar 39 = L; Ar 38 = L; Ar 37 = L; Ar 36 = L; Ar 40 = L, del cyc 1; Ar 39 = L, del cyc 1; Ar 38 = L; Ar 37 = L, del cyc 1; Ar 36 = L @ ---	Unknown; 600/300	LLLLLL	1		0	Eurotherm	750	750	0	0	0	35370	23838
X	C	875	0.709686	0.013954	0.174079	2.1268	13.42	2.93087	0.000774646	13.309	10.8112	19.955	1.98581	25331	Unknown; Automated furnace analysis ; 600/300	nm-108	1.00531	0.00097	1	0		50365-01C	MTK98-113, D1:108	3	1999-08-02	23.3064	3016481000	TW	anorthoclase, 163.55	0	Takahe		Macintosh HD:Users:mcintosh:Documents: Atlas Wilch 2019: MBL MS Data:Takahe:MS Data Takahe iso all:MS Lookup Table	7.875	Bs Mult = L; Ar 40 = L; Ar 39 = L; Ar 38 = L; Ar 37 = L; Ar 36 = L; Ar 40 = L, del cyc 1; Ar 39 = L, del cyc 1; Ar 38 = L; Ar 37 = L, del cyc 1; Ar 36 = L @ ---	Unknown; Automated furnace analysis ; 600/300	LLLLLL	1		0	Eurotherm	875	875	0	0	0	36000	25331
	D	975	0.521393	0.0129282	0.170471	1.3472	50.5559	2.99291	0.000530779	26.1286	47.0487	28.7818	0.835046	26812	Unknown; 600/300	nm-108	1.00531	0.00097	1	0		50365-01D	MTK98-113, D1:108	3	1999-08-02	23.8303	3016483000	TW	anorthoclase, 163.55	0	Takahe		Macintosh HD:Users:mcintosh:Documents: Atlas Wilch 2019: MBL MS Data:Takahe:MS Data Takahe iso all:MS Lookup Table	7.875	Bs Mult = L; Ar 40 = L; Ar 39 = L; Ar 38 = L; Ar 37 = L; Ar 36 = L @ ---	Unknown; 600/300	LLLLLL	1		0	Eurotherm	975	975	0	0	0	36110	26812
	E	1075	0.616549	0.0129104	0.17305	1.4457	30.8222	2.9483	0.000520788	32.8407	69.1414	42.7776	1.03583	24838	Unknown; 600/300	nm-108	1.00531	0.00097	1	0		50365-01E	MTK98-113, D1:108	3	1999-08-03	0.3225	3016484000	TW	anorthoclase, 163.55	0	Takahe		Macintosh HD:Users:mcintosh:Documents: Atlas Wilch 2019: MBL MS Data:Takahe:MS Data Takahe iso all:MS Lookup Table	7.875	Bs Mult = L; Ar 40 = L; Ar 39 = L; Ar 38 = L; Ar 37 = L; Ar 36 = L @ ---	Unknown; 600/300	LLLLLL	1		0	Eurotherm	1075	1075	0	0	0	34969	24838
X	F	1175	1.45074	0.0137229	0.172638	3.1503	20.7003	2.95535	0.000657598	36.7359	83.9789	112.592	1.77144	25401	Unknown; 600/300	nm-108	1.00531	0.00097	1	0		50365-01F	MTK98-113, D1:108	3	1999-08-03	0.812222	3016486000	TW	anorthoclase, 163.55	0	Takahe		Macintosh HD:Users:mcintosh:Documents: Atlas Wilch 2019: MBL MS Data:Takahe:MS Data Takahe iso all:MS Lookup Table	7.875	Bs Mult = L; Ar 40 = L; Ar 39 = L; Ar 38 = L; Ar 37 = L; Ar 36 = L @ ---	Unknown; 600/300	LLLLLL	1		0	Eurotherm	1175	1175	0	0	0	35269	25401
X	G	1275	5.69758	0.0147146	0.166191	9.2354	7.66316	3.06998	0.000617107	52.3228	89.4717	629.718	5.19461	26517	Unknown; Automated furnace analysis ; 600/300	nm-108	1.00531	0.00097	1	0		50365-01G	MTK98-113, D1:108	3	1999-08-03	1.7425	3016489000	TW	anorthoclase, 163.55	0	Takahe		Macintosh HD:Users:mcintosh:Documents: Atlas Wilch 2019: MBL MS Data:Takahe:MS Data Takahe iso all:MS Lookup Table	7.875	Bs Mult = L; Ar 40 = L; Ar 39 = L; Ar 38 = L; Ar 37 = L; Ar 36 = L @ ---	Unknown; Automated furnace analysis ; 600/300	LLLLLL	1		0	Eurotherm	1275	1275	0	0	0	36007	26517
X	H	1350	3.40767	0.0143204	0.181075	6.9125	10.0298	2.81764	0.000628435	40.4617	96.6609	291.28	3.59592	27703	Unknown; 600/300	nm-108	1.00531	0.00097	1	0		50365-01H	MTK98-113, D1:108	3	1999-08-03	2.23194	3016491000	TW	anorthoclase, 163.55	0	Takahe		Macintosh HD:Users:mcintosh:Documents: Atlas Wilch 2019: MBL MS Data:Takahe:MS Data Takahe iso all:MS Lookup Table	7.875	Bs Mult = L; Ar 40 = L; Ar 39 = L; Ar 38 = L; Ar 37 = L; Ar 36 = L @ ---	Unknown; 600/300	LLLLLL	1		0	Eurotherm	1350	1350	0	0	0	35710	27703
X	I	1425	2.35102	0.0133458	0.1916	5.5284	2.77171	2.66286	0.000430282	31.1327	98.6476	154.633	7.88508	29384	Unknown; 600/300	nm-108	1.00531	0.00097	1	0		50365-01I	MTK98-113, D1:108	3	1999-08-03	2.72306	3016493000	TW	anorthoclase, 163.55	0	Takahe		Macintosh HD:Users:mcintosh:Documents: Atlas Wilch 2019: MBL MS Data:Takahe:MS Data Takahe iso all:MS Lookup Table	7.875	Bs Mult = L; Ar 40 = L; Ar 39 = L; Ar 38 = L; Ar 37 = L; Ar 36 = L; Ar 40 = L, del cyc 1; Ar 39 = L, del cyc 1; Ar 38 = L; Ar 37 = L, del cyc 1; Ar 36 = L @ ---	Unknown; 600/300	LLLLLL	1		0	Eurotherm	1425	1425	0	0	0	34996	29384
X	J	1500	3.23444	0.0136679	0.208215	11.8854	0.624152	2.45038	0.000190584	-8.09631	99.095	-55.3282	30.9696	29647	Unknown; 600/300	nm-108	1.00531	0.00097	1	0		50365-01J	MTK98-113, D1:108	3	1999-08-03	3.23333	3016495000	TW	anorthoclase, 163.55	0	Takahe		Macintosh HD:Users:mcintosh:Documents: Atlas Wilch 2019: MBL MS Data:Takahe:MS Data Takahe iso all:MS Lookup Table	7.875	Bs Mult = L; Ar 40 = L; Ar 39 = L; Ar 38 = L; Ar 37 = L; Ar 36 = L; Ar 40 = L, del cyc 1; Ar 39 = L, del cyc 1; Ar 38 = L; Ar 37 = L, del cyc 1; Ar 36 = L @ ---	Unknown; 600/300	LLLLLL	1		0	Eurotherm	1500	1500	0	0	0	35468	29647
X	K	1575	5.83598	0.015845	0.205665	18.9947	0.284638	2.48075	0.000425528	4.0896	99.299	50.4244	74.8708	28044	Unknown; Automated furnace analysis ; 600/300	nm-108	1.00531	0.00097	1	0		50365-01K	MTK98-113, D1:108	3	1999-08-03	4.19833	3016498000	TW	anorthoclase, 163.55	0	Takahe		Macintosh HD:Users:mcintosh:Documents: Atlas Wilch 2019: MBL MS Data:Takahe:MS Data Takahe iso all:MS Lookup Table	7.875	Bs Mult = L; Ar 40 = L; Ar 39 = L; Ar 38 = L; Ar 37 = L; Ar 36 = L; Ar 40 = L, del cyc 1; Ar 39 = L, del cyc 1; Ar 38 = L; Ar 37 = L, del cyc 1; Ar 36 = L @ ---	Unknown; Automated furnace analysis ; 600/300	LLLLLL	1		0	Eurotherm	1575	1575	0	0	0	36006	28044
X	L	1650	14.2164	0.0261108	0.259253	49.3732	0.320798	1.96798	0.0016974	-2.48708	99.529	-74.7062	75.2843	28630	Unknown; 600/300	nm-108	1.00531	0.00097	1	0		50365-01L	MTK98-113, D1:108	3	1999-08-03	4.71556	3016500000	TW	anorthoclase, 163.55	0	Takahe		Macintosh HD:Users:mcintosh:Documents: Atlas Wilch 2019: MBL MS Data:Takahe:MS Data Takahe iso all:MS Lookup Table	7.875	Bs Mult = L; Ar 40 = L; Ar 39 = L; Ar 38 = L; Ar 37 = L; Ar 36 = L; Ar 40 = L, del cyc 1 2; Ar 39 = L, del cyc 1; Ar 38 = L; Ar 37 = L, del cyc 1 2; Ar 36 = L @ ---	Unknown; 600/300	LLLLLL	1		0	Eurotherm	1650	1650	0	0	0	35282	28630
X	M	1800	22.9722	0.0310071	0.189615	77.1242	0.657124	2.69074	0.00161546	0.85524	100	41.508	48.8886	26832	Unknown; 600/300	nm-108	1.00531	0.00097	1	0		50365-01M	MTK98-113, D1:108	3	1999-08-03	5.23	3016502000	TW	anorthoclase, 163.55	0	Takahe		Macintosh HD:Users:mcintosh:Documents: Atlas Wilch 2019: MBL MS Data:Takahe:MS Data Takahe iso all:MS Lookup Table	7.875	Bs Mult = L; Ar 40 = L; Ar 39 = L; Ar 38 = L; Ar 37 = L; Ar 36 = L; Ar 40 = L, del cyc 1 2; Ar 39 = L, del cyc 1; Ar 38 = L; Ar 37 = L, del cyc 1 2; Ar 36 = L @ ---	Unknown; 600/300	LLLLLL	1		0	Eurotherm	1800	1800	0	0	0	34989	26832
	Integrated age ± 2s				n=12		139.513	2.9458				97.3678	2.38311			nm-108
	Plateau ± 2s		steps D-E		n=2	MSWD=110.65	81.3781	2.976±0.063			58.3302	34.2948	13.6772			nm-108
	Isochron±2s		steps B-M		n=12	MSWD=364.07		40Ar/36Ar=		517.4±5.6		-31.263	1.08029
	MTK98-113, D2:NM108, anorthoclase, 16.7 mg, J=0.0001171±0.10%, D=1.00531±0.00097, nm-108, Lab#=50365-02, MAP
	C	4	0.527499	0.0122143	0.170222	0.8781	1.76793	2.99729	0.000357293	53.2546	11.9717	59.349	9.93602	2631	Unknown; Automated laser analysis ; 600/120	nm-108	1.00531	0.00097	1	0		50365-02C	MTK98-113, D2:NM108	3	1999-08-01	0.448611	3016312000	tw	anorthoclase, 16.7 mg	0	takahe		Macintosh HD:Users:mcintosh:Documents: Atlas Wilch 2019: MBL MS Data:Takahe:MS Data Takahe iso all:MS Lookup Table	7.875	Bs Mult = L; Ar 40 = L; Ar 39 = L; Ar 38 = L; Ar 37 = L; Ar 36 = L @ ---	Unknown; Automated laser analysis ; 600/120	LLLLLL	1		0	CO2 Laser	4	4	0	0	0	2820	2631
	D	6	0.429082	0.013421	0.179203	0.8889	3.35962	2.84708	0.000691174	41.9546	34.7218	38.0329	7.17253	2710	Unknown; Automated laser analysis ; 600/120	nm-108	1.00531	0.00097	1	0		50365-02D	MTK98-113, D2:NM108	3	1999-08-01	0.684444	3016313000	tw	anorthoclase, 16.7 mg	0	takahe		Macintosh HD:Users:mcintosh:Documents: Atlas Wilch 2019: MBL MS Data:Takahe:MS Data Takahe iso all:MS Lookup Table	7.875	Bs Mult = L; Ar 40 = L; Ar 39 = L; Ar 38 = L; Ar 37 = L; Ar 36 = L @ ---	Unknown; Automated laser analysis ; 600/120	LLLLLL	1		0	CO2 Laser	6	6	0	0	0	2899	2710
	E	8	0.458527	0.0137321	0.184127	1.0096	3.38976	2.77093	0.000771189	37.9915	57.6759	36.8038	6.70376	2708	Unknown; Automated laser analysis ; 600/120	nm-108	1.00531	0.00097	1	0		50365-02E	MTK98-113, D2:NM108	3	1999-08-01	1.09806	3016314000	tw	anorthoclase, 16.7 mg	0	takahe		Macintosh HD:Users:mcintosh:Documents: Atlas Wilch 2019: MBL MS Data:Takahe:MS Data Takahe iso all:MS Lookup Table	7.875	Bs Mult = L; Ar 40 = L; Ar 39 = L; Ar 38 = L; Ar 37 = L; Ar 36 = L; Ar 40 = L, del cyc 1; Ar 39 = L, del cyc 1; Ar 38 = L; Ar 37 = L, del cyc 1; Ar 36 = L @ ---	Unknown; Automated laser analysis ; 600/120	LLLLLL	1		0	CO2 Laser	8	8	0	0	0	2898	2708
	F	10	0.41868	0.0133889	0.18151	1.015	3.1214	2.81089	0.000675788	31.6603	78.8128	28.0052	6.97725	2706	Unknown; Automated laser analysis ; 600/120	nm-108	1.00531	0.00097	1	0		50365-02F	MTK98-113, D2:NM108	3	1999-08-01	1.33306	3016315000	tw	anorthoclase, 16.7 mg	0	takahe		Macintosh HD:Users:mcintosh:Documents: Atlas Wilch 2019: MBL MS Data:Takahe:MS Data Takahe iso all:MS Lookup Table	7.875	Bs Mult = L; Ar 40 = L; Ar 39 = L; Ar 38 = L; Ar 37 = L; Ar 36 = L; Ar 40 = L, del cyc 1; Ar 39 = L, del cyc 1; Ar 38 = L; Ar 37 = L, del cyc 1; Ar 36 = L @ ---	Unknown; Automated laser analysis ; 600/120	LLLLLL	1		0	CO2 Laser	10	10	0	0	0	2896	2706
	G	12	0.437015	0.0139883	0.180882	0.9761	2.02762	2.82064	0.000843847	37.1506	92.543	34.3006	9.82519	2749	Unknown; Automated laser analysis ; 600/120	nm-108	1.00531	0.00097	1	0		50365-02G	MTK98-113, D2:NM108	3	1999-08-01	1.55917	3016316000	tw	anorthoclase, 16.7 mg	0	takahe		Macintosh HD:Users:mcintosh:Documents: Atlas Wilch 2019: MBL MS Data:Takahe:MS Data Takahe iso all:MS Lookup Table	7.875	Bs Mult = L; Ar 40 = L; Ar 39 = L; Ar 38 = L; Ar 37 = L; Ar 36 = L; Ar 40 = L, del cyc 1; Ar 39 = L, del cyc 1; Ar 38 = L; Ar 37 = L, del cyc 1; Ar 36 = L @ ---	Unknown; Automated laser analysis ; 600/120	LLLLLL	1		0	CO2 Laser	12	12	0	0	0	2938	2749
	H	14	0.29617	0.014442	0.175663	0.8541	1.10122	2.90444	0.000975771	19.3026	100	12.0781	16.4979	2694	Unknown; Automated laser analysis ; 600/120	nm-108	1.00531	0.00097	1	0		50365-02H	MTK98-113, D2:NM108	3	1999-08-01	1.79944	3016317000	tw	anorthoclase, 16.7 mg	0	takahe		Macintosh HD:Users:mcintosh:Documents: Atlas Wilch 2019: MBL MS Data:Takahe:MS Data Takahe iso all:MS Lookup Table	7.875	Bs Mult = L; Ar 40 = L; Ar 39 = L; Ar 38 = L; Ar 37 = L; Ar 36 = L; Ar 40 = L, del cyc 1; Ar 39 = L, del cyc 1; Ar 38 = L; Ar 37 = L, del cyc 1; Ar 36 = L @ ---	Unknown; Automated laser analysis ; 600/120	LLLLLL	1		0	CO2 Laser	14	14	0	0	0	2882	2694
	Integrated age ± 2s				n=6		14.7676	2.839			K2O=2.90%	35.7164	6.9428			nm-108
	Plateau ± 2s		steps C-H		n=6	MSWD=1.81	14.7676	2.8 ±0.2			100	36.28	9.15745			nm-108
	Isochron±2s											no isochron
	MTK98-113, D2:108, anorthoclase, 34.05 mg, J=0.0001171±0.10%, D=1.00531±0.00097, nm-108, Lab#=50365-04, MAP
Xi	B	3	3.81204	0.0177035	0.17775	10.3832	0.381068	2.87034	0.00138589	19.868	2.62936	160.006	21.8058	8557	Unknown; Automated laser analysis ; 600/200	nm-108	1.00531	0.00097	1	0		50365-04B	MTK98-113, D2:108	3	1999-08-05	11.4775	3016697000	TW	anorthoclase, 34.05 mg	0	Mt. Takahe		Macintosh HD:Users:mcintosh:Documents: Atlas Wilch 2019: MBL MS Data:Takahe:MS Data Takahe iso all:MS Lookup Table	7.875	Bs Mult = L; Ar 40 = L; Ar 39 = L; Ar 38 = L; Ar 37 = L; Ar 36 = L; Ar 40 = L, del cyc 1; Ar 39 = L, del cyc 1; Ar 38 = L; Ar 37 = L, del cyc 1; Ar 36 = L; Ar 40 = L, del cyc 1 2; Ar 39 = L, del cyc 1 2; Ar 38 = L; Ar 37 = L, del cyc 1 2; Ar 36 = L @ ---	Unknown; Automated laser analysis ; 600/200	LLLLLL	1		0	CO2 Laser	3	3	0	0	0	8746	8557
	C	6	0.39572	0.0141472	0.182815	0.7759	2.73826	2.79082	0.000898267	45.5787	21.5233	38.1058	3.79503	8552	Unknown; Automated laser analysis ; 600/200	nm-108	1.00531	0.00097	1	0		50365-04C	MTK98-113, D2:108	3	1999-08-05	12.2861	3016700000	TW	anorthoclase, 34.05 mg	0	Mt. Takahe		Macintosh HD:Users:mcintosh:Documents: Atlas Wilch 2019: MBL MS Data:Takahe:MS Data Takahe iso all:MS Lookup Table	7.875	Bs Mult = L; Ar 40 = L; Ar 39 = L; Ar 38 = L; Ar 37 = L; Ar 36 = L; Ar 40 = L, del cyc 1; Ar 39 = L, del cyc 1; Ar 38 = L; Ar 37 = L, del cyc 1; Ar 36 = L @ ---	Unknown; Automated laser analysis ; 600/200	LLLLLL	1		0	CO2 Laser	6	6	0	0	0	8741	8552
	D	9	0.430864	0.0139782	0.183302	0.9431	3.15509	2.7834	0.000842798	38.5567	43.2934	35.0979	3.25864	8558	Unknown; Automated laser analysis ; 600/200	nm-108	1.00531	0.00097	1	0		50365-04D	MTK98-113, D2:108	3	1999-08-05	12.8383	3016702000	TW	anorthoclase, 34.05 mg	0	Mt. Takahe		Macintosh HD:Users:mcintosh:Documents: Atlas Wilch 2019: MBL MS Data:Takahe:MS Data Takahe iso all:MS Lookup Table	7.875	Bs Mult = L; Ar 40 = L; Ar 39 = L; Ar 38 = L; Ar 37 = L; Ar 36 = L; Ar 40 = L, del cyc 1; Ar 39 = L, del cyc 1; Ar 38 = L; Ar 37 = L, del cyc 1; Ar 36 = L @ ---	Unknown; Automated laser analysis ; 600/200	LLLLLL	1		0	CO2 Laser	9	9	0	0	0	8748	8558
	E	12	0.757651	0.0138631	0.190926	1.9761	2.75685	2.67226	0.00075754	24.8471	62.3156	39.773	3.30539	8556	Unknown; Automated laser analysis ; 600/200	nm-108	1.00531	0.00097	1	0		50365-04E	MTK98-113, D2:108	3	1999-08-05	13.6344	3016705000	TW	anorthoclase, 34.05 mg	0	Mt. Takahe		Macintosh HD:Users:mcintosh:Documents: Atlas Wilch 2019: MBL MS Data:Takahe:MS Data Takahe iso all:MS Lookup Table	7.875	Bs Mult = L; Ar 40 = L; Ar 39 = L; Ar 38 = L; Ar 37 = L; Ar 36 = L; Ar 40 = L, del cyc 1; Ar 39 = L, del cyc 1; Ar 38 = L; Ar 37 = L, del cyc 1; Ar 36 = L @ ---	Unknown; Automated laser analysis ; 600/200	LLLLLL	1		0	CO2 Laser	12	12	0	0	0	8744	8556
Xi	F	15	1.02038	0.0148297	0.18514	2.0963	1.60743	2.75578	0.001019	40.6745	73.4068	87.6834	5.17504	8553	Unknown; Automated laser analysis ; 600/200	nm-108	1.00531	0.00097	1	0		50365-04F	MTK98-113, D2:108	3	1999-08-05	14.1642	3016707000	TW	anorthoclase, 34.05 mg	0	Mt. Takahe		Macintosh HD:Users:mcintosh:Documents: Atlas Wilch 2019: MBL MS Data:Takahe:MS Data Takahe iso all:MS Lookup Table	7.875	Bs Mult = L; Ar 40 = L; Ar 39 = L; Ar 38 = L; Ar 37 = L; Ar 36 = L; Ar 40 = L, del cyc 1 2; Ar 39 = L, del cyc 1 2; Ar 38 = L; Ar 37 = L, del cyc 1 2; Ar 36 = L @ ---	Unknown; Automated laser analysis ; 600/200	LLLLLL	1		0	CO2 Laser	15	15	0	0	0	8743	8553
Xi	G	25	2.07094	0.0161023	0.179753	2.7763	1.13713	2.83836	0.00133626	61.0484	81.253	267.087	7.95566	8552	Unknown; Automated laser analysis ; 600/200	nm-108	1.00531	0.00097	1	0		50365-04G	MTK98-113, D2:108	3	1999-08-05	14.9694	3016710000	TW	anorthoclase, 34.05 mg	0	Mt. Takahe		Macintosh HD:Users:mcintosh:Documents: Atlas Wilch 2019: MBL MS Data:Takahe:MS Data Takahe iso all:MS Lookup Table	7.875	Bs Mult = L; Ar 40 = L; Ar 39 = L; Ar 38 = L; Ar 37 = L; Ar 36 = L; Ar 40 = L, del cyc 1; Ar 39 = L, del cyc 1; Ar 38 = L; Ar 37 = L, del cyc 1; Ar 36 = L @ ---	Unknown; Automated laser analysis ; 600/200	LLLLLL	1		0	CO2 Laser	25	25	0	0	0	8742	8552
Xi	H	45	1.59597	0.0141164	0.186368	1.998	2.71697	2.73762	0.000826505	63.8959	100	215.436	3.76646	8554	Unknown; Automated laser analysis ; 600/200	nm-108	1.00531	0.00097	1	0		50365-04H	MTK98-113, D2:108	3	1999-08-05	15.5694	3016712000	TW	anorthoclase, 34.05 mg	0	Mt. Takahe		Macintosh HD:Users:mcintosh:Documents: Atlas Wilch 2019: MBL MS Data:Takahe:MS Data Takahe iso all:MS Lookup Table	7.875	Bs Mult = L; Ar 40 = L; Ar 39 = L; Ar 38 = L; Ar 37 = L; Ar 36 = L; Ar 40 = L, del cyc 1 2; Ar 39 = L, del cyc 1 2; Ar 38 = L; Ar 37 = L, del cyc 1 2; Ar 36 = L @ ---	Unknown; Automated laser analysis ; 600/200	LLLLLL	1		0	CO2 Laser	45	45	0	0	0	8743	8554
	Integrated age ± 2s				n=7		14.4928	2.75752			K2O=1.40%	101.534	3.60033			nm-108
	Plateau ± 2s		steps C-E		n=3	MSWD=0.52	8.6502	2.8 ±0.1			59.6862	37.5937	3.9603			nm-108
	Isochron±2s		steps C-E		n=3	MSWD=0.45		40Ar/36Ar=		309.0±36.7		34.1054	10.2319
	MTK98-115, F1:108, anorthoclase, 45.22 mg, J=0.0001183±0.10%, D=1.00531±0.00097, nm-108, Lab#=50376-01, MAP
X	A	1	27.9459	0.0542378	0.168533	45.0138	0.0188052	3.02733	0.00971357	52.4515	0.095235	3124.93	596.787	11433	Unknown; Automated laser analysis ; 600/200	nm-108	1.00531	0.00097	1	0		50376-01A	MTK98-115, F1:108	3	1999-08-10	19.905	3017160000	TW	anorthoclase, 45.22 mg	0	Mt. Takahe		Macintosh HD:Users:mcintosh:Documents: Atlas Wilch 2019: MBL MS Data:Takahe:MS Data Takahe iso all:MS Lookup Table	7.875	Bs Mult = L; Ar 40 = L; Ar 39 = L; Ar 38 = L; Ar 37 = L; Ar 36 = L; Ar 40 = L, del cyc 1; Ar 39 = L, del cyc 1; Ar 38 = L; Ar 37 = L; Ar 36 = L @ ---	Unknown; Automated laser analysis ; 600/200	LLLLLL	1		0	CO2 Laser	1	1	0	0	0	11623	11433
X	B	3	2.91597	0.014914	0.187359	4.91	0.281639	2.72313	0.000896686	50.7326	1.52154	315.63	39.3313	11433	Unknown; Automated laser analysis ; 600/200	nm-108	1.00531	0.00097	1	0		50376-01B	MTK98-115, F1:108	3	1999-08-10	20.5158	3017162000	TW	anorthoclase, 45.22 mg	0	Mt. Takahe		Macintosh HD:Users:mcintosh:Documents: Atlas Wilch 2019: MBL MS Data:Takahe:MS Data Takahe iso all:MS Lookup Table	7.875	Bs Mult = L; Ar 40 = L; Ar 39 = L; Ar 38 = L; Ar 37 = L; Ar 36 = L; Ar 40 = L, del cyc 1; Ar 39 = L, del cyc 1; Ar 38 = L; Ar 37 = L; Ar 36 = L @ ---	Unknown; Automated laser analysis ; 600/200	LLLLLL	1		0	CO2 Laser	3	3	0	0	0	11623	11433
	C	6	0.361755	0.0138585	0.193705	0.7114	2.87011	2.63392	0.000821803	45.9675	16.0566	35.4821	3.29766	11430	Unknown; Automated laser analysis ; 600/200	nm-108	1.00531	0.00097	1	0		50376-01C	MTK98-115, F1:108	3	1999-08-10	21.2853	3017165000	TW	anorthoclase, 45.22 mg	0	Mt. Takahe		Macintosh HD:Users:mcintosh:Documents: Atlas Wilch 2019: MBL MS Data:Takahe:MS Data Takahe iso all:MS Lookup Table	7.875	Bs Mult = L; Ar 40 = L; Ar 39 = L; Ar 38 = L; Ar 37 = L; Ar 36 = L; Ar 40 = L, del cyc 1; Ar 39 = L, del cyc 1; Ar 38 = L; Ar 37 = L; Ar 36 = L @ ---	Unknown; Automated laser analysis ; 600/200	LLLLLL	1		0	CO2 Laser	6	6	0	0	0	11619	11430
	D	9	0.24486	0.0138264	0.194188	0.4595	5.6412	2.62737	0.000825963	50.5881	44.6252	26.4309	1.73423	11427	Unknown; Automated laser analysis ; 600/200	nm-108	1.00531	0.00097	1	0		50376-01D	MTK98-115, F1:108	3	1999-08-10	21.8397	3017167000	TW	anorthoclase, 45.22 mg	0	Mt. Takahe		Macintosh HD:Users:mcintosh:Documents: Atlas Wilch 2019: MBL MS Data:Takahe:MS Data Takahe iso all:MS Lookup Table	7.875	Bs Mult = L; Ar 40 = L; Ar 39 = L; Ar 38 = L; Ar 37 = L; Ar 36 = L; Ar 40 = L, del cyc 1; Ar 39 = L, del cyc 1; Ar 38 = L; Ar 37 = L; Ar 36 = L @ ---	Unknown; Automated laser analysis ; 600/200	LLLLLL	1		0	CO2 Laser	9	9	0	0	0	11615	11427
X	E	12	0.332289	0.0130333	0.183857	0.4356	4.93164	2.775	0.000607317	65.4722	69.6004	46.4208	2.00536	11425	Unknown; Automated laser analysis ; 600/200	nm-108	1.00531	0.00097	1	0		50376-01E	MTK98-115, F1:108	3	1999-08-10	22.5944	3017169000	TW	anorthoclase, 45.22 mg	0	Mt. Takahe		Macintosh HD:Users:mcintosh:Documents: Atlas Wilch 2019: MBL MS Data:Takahe:MS Data Takahe iso all:MS Lookup Table	7.875	Bs Mult = L; Ar 40 = L; Ar 39 = L; Ar 38 = L; Ar 37 = L; Ar 36 = L; Ar 40 = L, del cyc 1; Ar 39 = L, del cyc 1; Ar 38 = L; Ar 37 = L; Ar 36 = L @ ---	Unknown; Automated laser analysis ; 600/200	LLLLLL	1		0	CO2 Laser	12	12	0	0	0	11614	11425
X	F	15	0.498016	0.014334	0.195945	0.523	2.27952	2.60381	0.000963327	71.969	81.1446	76.4765	4.0828	11442	Unknown; Automated laser analysis ; 600/200	nm-108	1.00531	0.00097	1	0		50376-01F	MTK98-115, F1:108	3	1999-08-10	23.1372	3017171000	TW	anorthoclase, 45.22 mg	0	Mt. Takahe		Macintosh HD:Users:mcintosh:Documents: Atlas Wilch 2019: MBL MS Data:Takahe:MS Data Takahe iso all:MS Lookup Table	7.875	Bs Mult = L; Ar 40 = L; Ar 39 = L; Ar 38 = L; Ar 37 = L; Ar 36 = L; Ar 40 = L, del cyc 1 2; Ar 39 = L, del cyc 1 2; Ar 38 = L; Ar 37 = L; Ar 36 = L @ ---	Unknown; Automated laser analysis ; 600/200	LLLLLL	1		0	CO2 Laser	15	15	0	0	0	11630	11442
X	G	25	1.07721	0.0156191	0.175944	0.9491	1.46102	2.89982	0.00129695	75.2124	88.5436	172.867	6.79175	11434	Unknown; Automated laser analysis ; 600/200	nm-108	1.00531	0.00097	1	0		50376-01G	MTK98-115, F1:108	3	1999-08-10	23.9036	3017174000	TW	anorthoclase, 45.22 mg	0	Mt. Takahe		Macintosh HD:Users:mcintosh:Documents: Atlas Wilch 2019: MBL MS Data:Takahe:MS Data Takahe iso all:MS Lookup Table	7.875	Bs Mult = L; Ar 40 = L; Ar 39 = L; Ar 38 = L; Ar 37 = L; Ar 36 = L; Ar 40 = L, del cyc 1 2; Ar 39 = L, del cyc 1 2; Ar 38 = L; Ar 37 = L; Ar 36 = L @ ---	Unknown; Automated laser analysis ; 600/200	LLLLLL	1		0	CO2 Laser	25	25	0	0	0	11622	11434
X	H	45	0.925425	0.0141833	0.179933	0.9759	2.2622	2.83552	0.000897864	70.3202	100	138.851	4.90681	11444	Unknown; Automated laser analysis ; 600/200	nm-108	1.00531	0.00097	1	0		50376-01H	MTK98-115, F1:108	3	1999-08-11	0.500278	3017176000	TW	anorthoclase, 45.22 mg	0	Mt. Takahe		Macintosh HD:Users:mcintosh:Documents: Atlas Wilch 2019: MBL MS Data:Takahe:MS Data Takahe iso all:MS Lookup Table	7.875	Bs Mult = L; Ar 40 = L; Ar 39 = L; Ar 38 = L; Ar 37 = L; Ar 36 = L; Ar 40 = L, del cyc 1 2 3; Ar 39 = L, del cyc 1 2 3; Ar 38 = L, del cyc 3; Ar 37 = L, del cyc 3; Ar 36 = L, del cyc 3; Ar 40 = L, del cyc 1 2 3; Ar 39 = L, del cyc 1 2 3; Ar 38 = L, del cyc 1 2 3; Ar 37 = L, del cyc 1 2 3; Ar 36 = L, del cyc 1 2 3 @ ---	Unknown; Automated laser analysis ; 600/200	LLLLLL	1		0	CO2 Laser	45	45	0	0	0	11632	11444
	Integrated age ± 2s				n=8		19.7461	2.70741			K2O=1.42%	70.7875	3.01645			nm-108
	Plateau ± 2s		steps C-D		n=2	MSWD=5.90	8.51132	2.630±0.009			43.1037	28.3918	7.45775			nm-108
	Isochron±2s		steps A-H		n=8	MSWD=7.19		40Ar/36Ar=		1177.5±223.6		-42.6253	15.1316
	MTK98-090 H4 and H5:108, gmass hawaiite, 172.9 MG, J=0.0001217±0.10%, D=1.00531±0.00097, nm-108, Lab#=50387-01, MAP
	A	675	122.925	0.0925199	0.814438	413.438	0.796898	0.62645	0.00126028	0.664089	1.73567	179.323	118.526	20158	Unknown; Automated furnace analysis ; 600/300	nm-108	1.00531	0.00097	1	0		50387-01A	MTK98-090 H4 and H5:108	3	1999-08-07	11.8125	3016871000	TW	gmass hawaiite, 172.9 MG	0	Takahe		Macintosh HD:Users:mcintosh:Documents: Atlas Wilch 2019: MBL MS Data:Takahe:MS Data Takahe iso all:MS Lookup Table	7.875	Bs Mult = L; Ar 40 = L; Ar 39 = L; Ar 38 = L; Ar 37 = L; Ar 36 = L @ ---	Unknown; Automated furnace analysis ; 600/300	LLLLLL	1		0	Eurotherm	675	675	0	0	0	35986	20158
	B	750	3.78996	0.0154575	0.482277	11.6425	6.02267	1.05791	0.000703466	10.1983	14.8532	84.8873	4.83129	17289	Unknown; 600/300	nm-108	1.00531	0.00097	1	0		50387-01B	MTK98-090 H4 and H5:108	3	1999-08-07	12.3017	3016873000	TW	gmass hawaiite, 172.9 MG	0	Takahe		Macintosh HD:Users:mcintosh:Documents: Atlas Wilch 2019: MBL MS Data:Takahe:MS Data Takahe iso all:MS Lookup Table	7.875	Bs Mult = L; Ar 40 = L; Ar 39 = L; Ar 38 = L; Ar 37 = L; Ar 36 = L @ ---	Unknown; 600/300	LLLLLL	1		0	Eurotherm	750	750	0	0	0	29213	17289
	C	800	2.054	0.0143396	0.365442	5.636	2.12011	1.39613	0.000702854	20.2782	19.4709	91.4695	8.43304	15086	Unknown; Automated furnace analysis ; 600/300	nm-108	1.00531	0.00097	1	0		50387-01C	MTK98-090 H4 and H5:108	3	1999-08-07	13.2258	3016876000	TW	gmass hawaiite, 172.9 MG	0	Takahe		Macintosh HD:Users:mcintosh:Documents: Atlas Wilch 2019: MBL MS Data:Takahe:MS Data Takahe iso all:MS Lookup Table	7.875	Bs Mult = L; Ar 40 = L; Ar 39 = L; Ar 38 = L; Ar 37 = L; Ar 36 = L @ ---	Unknown; Automated furnace analysis ; 600/300	LLLLLL	1		0	Eurotherm	800	800	0	0	0	28892	15086
	D	850	1.85797	0.013771	0.298548	4.9779	11.6794	1.70895	0.000578312	22.0563	44.909	89.9906	2.37565	19371	Unknown; 600/300	nm-108	1.00531	0.00097	1	0		50387-01D	MTK98-090 H4 and H5:108	3	1999-08-07	13.7131	3016878000	TW	gmass hawaiite, 172.9 MG	0	Takahe		Macintosh HD:Users:mcintosh:Documents: Atlas Wilch 2019: MBL MS Data:Takahe:MS Data Takahe iso all:MS Lookup Table	7.875	Bs Mult = L; Ar 40 = L; Ar 39 = L; Ar 38 = L; Ar 37 = L; Ar 36 = L @ ---	Unknown; 600/300	LLLLLL	1		0	Eurotherm	850	850	0	0	0	29099	19371
Xi	E	925	1.99513	0.0134723	0.314645	5.0365	9.71793	1.62152	0.000492779	26.6075	66.0749	116.574	2.65799	19990	Unknown; 600/300	nm-108	1.00531	0.00097	1	0		50387-01E	MTK98-090 H4 and H5:108	3	1999-08-07	14.2008	3016880000	TW	gmass hawaiite, 172.9 MG	0	Takahe		Macintosh HD:Users:mcintosh:Documents: Atlas Wilch 2019: MBL MS Data:Takahe:MS Data Takahe iso all:MS Lookup Table	7.875	Bs Mult = L; Ar 40 = L; Ar 39 = L; Ar 38 = L; Ar 37 = L; Ar 36 = L @ ---	Unknown; 600/300	LLLLLL	1		0	Eurotherm	925	925	0	0	0	29167	19990
Xi	F	1025	3.73059	0.0157736	0.502374	8.5125	5.74177	1.01559	0.000953475	33.6039	78.5806	275.317	4.50041	18590	Unknown; Automated furnace analysis ; 600/300	nm-108	1.00531	0.00097	1	0		50387-01F	MTK98-090 H4 and H5:108	3	1999-08-07	15.1186	3016883000	TW	gmass hawaiite, 172.9 MG	0	Takahe		Macintosh HD:Users:mcintosh:Documents: Atlas Wilch 2019: MBL MS Data:Takahe:MS Data Takahe iso all:MS Lookup Table	7.875	Bs Mult = L; Ar 40 = L; Ar 39 = L; Ar 38 = L; Ar 37 = L; Ar 36 = L @ ---	Unknown; Automated furnace analysis ; 600/300	LLLLLL	1		0	Eurotherm	1025	1025	0	0	0	28884	18590
Xi	G	1125	9.96346	0.0165902	0.789037	17.6488	3.18044	0.646616	0.000711409	48.2636	85.5077	1056.06	8.81425	19865	Unknown; 600/300	nm-108	1.00531	0.00097	1	0		50387-01G	MTK98-090 H4 and H5:108	3	1999-08-07	15.6078	3016885000	TW	gmass hawaiite, 172.9 MG	0	Takahe		Macintosh HD:Users:mcintosh:Documents: Atlas Wilch 2019: MBL MS Data:Takahe:MS Data Takahe iso all:MS Lookup Table	7.875	Bs Mult = L; Ar 40 = L; Ar 39 = L; Ar 38 = L; Ar 37 = L; Ar 36 = L @ ---	Unknown; 600/300	LLLLLL	1		0	Eurotherm	1125	1125	0	0	0	29086	19865
Xi	H	1300	23.5948	0.0234129	8.37822	50.6829	3.69048	0.0608965	0.00102852	39.2526	93.5457	2044.28	22.7224	20510	Unknown; 600/300; Det. IC= 82.97481	nm-108	1.00531	0.00097	1	0		50387-01H	MTK98-090 H4 and H5:108	3	1999-08-07	16.0931	3016887000	TW	gmass hawaiite, 172.9 MG	0	Takahe		Macintosh HD:Users:mcintosh:Documents: Atlas Wilch 2019: MBL MS Data:Takahe:MS Data Takahe iso all:MS Lookup Table	7.875	Bs Mult = L; Bs Far = L; Ar 40 = L; Ar 39 = L; Ar 38 = L; Ar 37 = L; Ar 36 = L @ ---	Unknown; 600/300; Det. IC= 82.97481	LLLLLLL	1		0	Eurotherm	1300	1300	0	0	0	29114	20510
Xi	I	1750	95.2734	0.0222276	3.11647	46.4611	2.96335	0.163712	0.000823171	85.8408	100	17906.2	57.6231	21290	Unknown; 600/300	nm-108	1.00531	0.00097	1	0		50387-01I	MTK98-090 H4 and H5:108	3	1999-08-07	16.8286	3016889000	TW	gmass hawaiite, 172.9 MG	0	Takahe		Macintosh HD:Users:mcintosh:Documents: Atlas Wilch 2019: MBL MS Data:Takahe:MS Data Takahe iso all:MS Lookup Table	7.875	Bs Mult = L; Ar 40 = L; Ar 39 = L; Ar 38 = L; Ar 37 = L; Ar 36 = L @ ---	Unknown; 600/300	LLLLLL	1		0	Eurotherm	1750	1750	0	0	0	29072	21290
	Integrated age ± 2s				n=9		45.913	0.41399			K2O=0.84%	1498.9	0.0152613			nm-108
	Plateau ± 2s		steps A-D		n=4	MSWD=0.52	20.6191	1.445±0.929			44.909	89.1729	4.13673			nm-108
	Isochron±2s		steps A-D		n=4	MSWD=0.71		40Ar/36Ar=		296.0±2.5		88.504	5.34562
	MTK-98087, C2:126, san, 67 mg, J=0.0001172±0.10%, D=1.00364±0.0011, NM-126, Lab#=51407-01, MAP
	B	3	16.2951	0.0236431	0.246551	51.43	0.469796	2.06936	0.000906977	6.85125	1.03253	236.006	38.2117	18026	Unknown; Automated laser analysis ; 600/340	NM-126	1.00364	0.0011	1	0		51407-01B	MTK-98087, C2:126	3	2000-07-13	13.0636	3046338000	wcm	san, 67 mg	0	MTK		Macintosh HD:Users:mcintosh:Documents: Atlas Wilch 2019: MBL MS Data:Takahe:MS Data Takahe iso all:MS Lookup Table	7.875	Bs Mult = L; Ar 40 = L; Ar 39 = L; Ar 38 = L; Ar 37 = L; Ar 36 = L @ ---	Unknown; Automated laser analysis ; 600/340	LLLLLL	1		0	CO2 Laser	3	3	0	0	0	18215	18026
	C	5	12.944	0.0209443	0.221114	40.898	2.10183	2.30742	0.000704238	6.76393	5.65199	185.081	15.7833	18026	Unknown; Automated laser analysis ; 600/340	NM-126	1.00364	0.0011	1	0		51407-01C	MTK-98087, C2:126	3	2000-07-13	14.1475	3046342000	wcm	san, 67 mg	0	MTK		Macintosh HD:Users:mcintosh:Documents: Atlas Wilch 2019: MBL MS Data:Takahe:MS Data Takahe iso all:MS Lookup Table	7.875	Bs Mult = L; Ar 40 = L; Ar 39 = L; Ar 38 = L; Ar 37 = L; Ar 36 = L @ ---	Unknown; Automated laser analysis ; 600/340	LLLLLL	1		0	CO2 Laser	5	5	0	0	0	18216	18026
	D	9	8.63196	0.0177594	0.167188	26.775	10.2582	3.05167	0.000552337	8.48816	28.1978	154.883	8.56424	18022	Unknown; Automated laser analysis ; 600/340	NM-126	1.00364	0.0011	1	0		51407-01D	MTK-98087, C2:126	3	2000-07-13	14.7228	3046344000	wcm	san, 67 mg	0	MTK		Macintosh HD:Users:mcintosh:Documents: Atlas Wilch 2019: MBL MS Data:Takahe:MS Data Takahe iso all:MS Lookup Table	7.875	Bs Mult = L; Ar 40 = L; Ar 39 = L; Ar 38 = L; Ar 37 = L; Ar 36 = L @ ---	Unknown; Automated laser analysis ; 600/340	LLLLLL	1		0	CO2 Laser	9	9	0	0	0	18210	18022
	E	15	1.43787	0.0129487	0.116154	1.7137	13.6211	4.39247	0.000516611	65.3946	58.1347	198.756	1.40524	18020	Unknown; Automated laser analysis ; 600/340	NM-126	1.00364	0.0011	1	0		51407-01E	MTK-98087, C2:126	3	2000-07-13	15.4931	3046347000	wcm	san, 67 mg	0	MTK		Macintosh HD:Users:mcintosh:Documents: Atlas Wilch 2019: MBL MS Data:Takahe:MS Data Takahe iso all:MS Lookup Table	7.875	Bs Mult = L; Ar 40 = L; Ar 39 = L; Ar 38 = L; Ar 37 = L; Ar 36 = L @ ---	Unknown; Automated laser analysis ; 600/340	LLLLLL	1		0	CO2 Laser	15	15	0	0	0	18210	18020
	F	20	1.17402	0.0134478	0.101344	0.9898	5.47388	5.03438	0.000692122	75.7425	70.1653	187.963	1.8799	18027	Unknown; Automated laser analysis ; 600/340	NM-126	1.00364	0.0011	1	0		51407-01F	MTK-98087, C2:126	3	2000-07-13	16.0239	3046349000	wcm	san, 67 mg	0	MTK		Macintosh HD:Users:mcintosh:Documents: Atlas Wilch 2019: MBL MS Data:Takahe:MS Data Takahe iso all:MS Lookup Table	7.875	Bs Mult = L; Ar 40 = L; Ar 39 = L; Ar 38 = L; Ar 37 = L; Ar 36 = L @ ---	Unknown; Automated laser analysis ; 600/340	LLLLLL	1		0	CO2 Laser	20	20	0	0	0	18215	18027
	G	25	1.37454	0.0132344	0.0859082	1.0747	4.17849	5.93894	0.000628362	77.3709	79.3489	224.794	3.14226	18021	Unknown; Automated laser analysis ; 600/340	NM-126	1.00364	0.0011	1	0		51407-01G	MTK-98087, C2:126	3	2000-07-13	16.8472	3046352000	wcm	san, 67 mg	0	MTK		Macintosh HD:Users:mcintosh:Documents: Atlas Wilch 2019: MBL MS Data:Takahe:MS Data Takahe iso all:MS Lookup Table	7.875	Bs Mult = L; Ar 40 = L; Ar 39 = L; Ar 38 = L; Ar 37 = L; Ar 36 = L @ ---	Unknown; Automated laser analysis ; 600/340	LLLLLL	1		0	CO2 Laser	25	25	0	0	0	18209	18021
	H	30	1.09347	0.0134492	0.0743972	1.0631	3.69625	6.85784	0.000688281	71.7862	87.4727	165.92	3.44495	18029	Unknown; Automated laser analysis ; 600/340	NM-126	1.00364	0.0011	1	0		51407-01H	MTK-98087, C2:126	3	2000-07-13	17.4492	3046354000	wcm	san, 67 mg	0	MTK		Macintosh HD:Users:mcintosh:Documents: Atlas Wilch 2019: MBL MS Data:Takahe:MS Data Takahe iso all:MS Lookup Table	7.875	Bs Mult = L; Ar 40 = L; Ar 39 = L; Ar 38 = L; Ar 37 = L; Ar 36 = L @ ---	Unknown; Automated laser analysis ; 600/340	LLLLLL	1		0	CO2 Laser	30	30	0	0	0	18218	18029
	I	35	0.995131	0.0138635	0.0813236	0.489	2.60449	6.27375	0.00083289	86.1021	93.1969	181.111	3.88543	18026	Unknown; Automated laser analysis ; 600/340	NM-126	1.00364	0.0011	1	0		51407-01I	MTK-98087, C2:126	3	2000-07-13	18.27	3046357000	wcm	san, 67 mg	0	MTK		Macintosh HD:Users:mcintosh:Documents: Atlas Wilch 2019: MBL MS Data:Takahe:MS Data Takahe iso all:MS Lookup Table	7.875	Bs Mult = L; Ar 40 = L; Ar 39 = L; Ar 38 = L; Ar 37 = L; Ar 36 = L @ ---	Unknown; Automated laser analysis ; 600/340	LLLLLL	1		0	CO2 Laser	35	35	0	0	0	18214	18026
	J	40	1.15599	0.0135954	0.0626262	1.0004	1.47021	8.14681	0.000731838	74.8379	96.4282	182.862	6.80132	18024	Unknown; Automated laser analysis ; 600/340	NM-126	1.00364	0.0011	1	0		51407-01J	MTK-98087, C2:126	3	2000-07-13	18.8528	3046359000	wcm	san, 67 mg	0	MTK		Macintosh HD:Users:mcintosh:Documents: Atlas Wilch 2019: MBL MS Data:Takahe:MS Data Takahe iso all:MS Lookup Table	7.875	Bs Mult = L; Ar 40 = L; Ar 39 = L; Ar 38 = L; Ar 37 = L; Ar 36 = L @ ---	Unknown; Automated laser analysis ; 600/340	LLLLLL	1		0	CO2 Laser	40	40	0	0	0	18213	18024
	K	45	1.41084	0.0147021	0.0799093	1.5264	1.06258	6.38479	0.00101145	68.4625	98.7635	204.164	10.553	18026	Unknown; Automated laser analysis ; 600/340	NM-126	1.00364	0.0011	1	0		51407-01K	MTK-98087, C2:126	3	2000-07-13	19.7233	3046362000	wcm	san, 67 mg	0	MTK		Macintosh HD:Users:mcintosh:Documents: Atlas Wilch 2019: MBL MS Data:Takahe:MS Data Takahe iso all:MS Lookup Table	7.875	Bs Mult = L; Ar 40 = L; Ar 39 = L; Ar 38 = L; Ar 37 = L; Ar 36 = L @ ---	Unknown; Automated laser analysis ; 600/340	LLLLLL	1		0	CO2 Laser	45	45	0	0	0	18216	18026
X	L	50	1.80981	0.0146066	0.0890451	1.1563	0.562585	5.72973	0.00100431	81.4971	100	311.755	19.1835	18022	Unknown; Automated laser analysis ; 600/340	NM-126	1.00364	0.0011	1	0		51407-01L	MTK-98087, C2:126	3	2000-07-13	20.3442	3046364000	wcm	san, 67 mg	0	MTK		Macintosh HD:Users:mcintosh:Documents: Atlas Wilch 2019: MBL MS Data:Takahe:MS Data Takahe iso all:MS Lookup Table	7.875	Bs Mult = L; Ar 40 = L; Ar 39 = L; Ar 38 = L; Ar 37 = L; Ar 36 = L @ ---	Unknown; Automated laser analysis ; 600/340	LLLLLL	1		0	CO2 Laser	50	50	0	0	0	18211	18022
	Integrated age ± 2s				n=11		45.4994	4.21639			K2O=2.23%	187.079	6.18028			NM-126
	Plateau ± 2s		steps B-K		n=10	MSWD=24.58	44.9368	4.668±4.097			98.7635	193.917	9.50501			NM-126
	Isochron±2s		steps B-L		n=11	MSWD=28.42		40Ar/36Ar=		293.3±2.3		139.879	2.11724
	MTK98121, San, 85mg, J=0.0001172±0.10%, D=1.00364±0.0011, NM-126, Lab#=51408-01, MAP
Xi	B	5	3.20919	0.0153141	0.0452207	9.9791	1.53453	11.2825	0.000742687	8.21929	2.38496	55.7554	9.26758	18304	Unknown; Automated laser analysis ; 600/340	NM-126	1.00364	0.0011	1	0		51408-01B	MTK98121	3	2000-07-14	23.9589	3046464000	wcm	San, 85mg	0	MTK		Macintosh HD:Users:mcintosh:Documents: Atlas Wilch 2019: MBL MS Data:Takahe:MS Data Takahe iso all:MS Lookup Table	7.875	Bs Mult = L; Ar 40 = L; Ar 39 = L; Ar 38 = L; Ar 37 = L; Ar 36 = L @ ---	Unknown; Automated laser analysis ; 600/340	LLLLLL	1		0	CO2 Laser	5	5	0	0	0	18492	18304
	C	8	0.73604	0.0133869	0.0413944	2.3193	4.9628	12.3254	0.00060544	7.30598	10.0981	11.3669	2.69725	18309	Unknown; Automated laser analysis ; 600/340	NM-126	1.00364	0.0011	1	0		51408-01C	MTK98121	3	2000-07-15	0.803056	3046467000	wcm	San, 85mg	0	MTK		Macintosh HD:Users:mcintosh:Documents: Atlas Wilch 2019: MBL MS Data:Takahe:MS Data Takahe iso all:MS Lookup Table	7.875	Bs Mult = L; Ar 40 = L; Ar 39 = L; Ar 38 = L; Ar 37 = L; Ar 36 = L @ ---	Unknown; Automated laser analysis ; 600/340	LLLLLL	1		0	CO2 Laser	8	8	0	0	0	18498	18309
	D	11	0.485892	0.0132036	0.0338801	1.5598	8.10617	15.0591	0.000593875	5.65763	22.6967	5.81077	1.68702	18298	Unknown; Automated laser analysis ; 600/340	NM-126	1.00364	0.0011	1	0		51408-01D	MTK98121	3	2000-07-15	1.40861	3046469000	wcm	San, 85mg	0	MTK		Macintosh HD:Users:mcintosh:Documents: Atlas Wilch 2019: MBL MS Data:Takahe:MS Data Takahe iso all:MS Lookup Table	7.875	Bs Mult = L; Ar 40 = L; Ar 39 = L; Ar 38 = L; Ar 37 = L; Ar 36 = L @ ---	Unknown; Automated laser analysis ; 600/340	LLLLLL	1		0	CO2 Laser	11	11	0	0	0	18486	18298
	E	14	0.53629	0.0126454	0.040197	1.8424	9.30968	12.6926	0.000424716	-0.966203	37.1658	-1.09529	1.37429	18301	Unknown; Automated laser analysis ; 600/340	NM-126	1.00364	0.0011	1	0		51408-01E	MTK98121	3	2000-07-15	2.24361	3046472000	wcm	San, 85mg	0	MTK		Macintosh HD:Users:mcintosh:Documents: Atlas Wilch 2019: MBL MS Data:Takahe:MS Data Takahe iso all:MS Lookup Table	7.875	Bs Mult = L; Ar 40 = L; Ar 39 = L; Ar 38 = L; Ar 37 = L; Ar 36 = L @ ---	Unknown; Automated laser analysis ; 600/340	LLLLLL	1		0	CO2 Laser	14	14	0	0	0	18490	18301
	F	17	0.488346	0.0127415	0.0395252	1.7052	8.32047	12.9083	0.000458431	-2.58241	50.0975	-2.66572	1.45768	18301	Unknown; Automated laser analysis ; 600/340	NM-126	1.00364	0.0011	1	0		51408-01F	MTK98121	3	2000-07-15	2.80056	3046474000	wcm	San, 85mg	0	MTK		Macintosh HD:Users:mcintosh:Documents: Atlas Wilch 2019: MBL MS Data:Takahe:MS Data Takahe iso all:MS Lookup Table	7.875	Bs Mult = L; Ar 40 = L; Ar 39 = L; Ar 38 = L; Ar 37 = L; Ar 36 = L @ ---	Unknown; Automated laser analysis ; 600/340	LLLLLL	1		0	CO2 Laser	17	17	0	0	0	18490	18301
	G	20	0.400293	0.0132519	0.0382684	1.3633	7.31855	13.3323	0.000617501	0.0692427	61.4719	0.0585886	1.50308	18301	Unknown; Automated laser analysis ; 600/340	NM-126	1.00364	0.0011	1	0		51408-01G	MTK98121	3	2000-07-15	3.59778	3046477000	wcm	San, 85mg	0	MTK		Macintosh HD:Users:mcintosh:Documents: Atlas Wilch 2019: MBL MS Data:Takahe:MS Data Takahe iso all:MS Lookup Table	7.875	Bs Mult = L; Ar 40 = L; Ar 39 = L; Ar 38 = L; Ar 37 = L; Ar 36 = L @ ---	Unknown; Automated laser analysis ; 600/340	LLLLLL	1		0	CO2 Laser	20	20	0	0	0	18490	18301
	H	28	0.337728	0.0125658	0.0385824	1.1508	9.58894	13.2237	0.000438455	0.150896	76.375	0.107722	1.13617	18301	Unknown; Automated laser analysis ; 600/340	NM-126	1.00364	0.0011	1	0		51408-01H	MTK98121	3	2000-07-15	4.19778	3046479000	wcm	San, 85mg	0	MTK		Macintosh HD:Users:mcintosh:Documents: Atlas Wilch 2019: MBL MS Data:Takahe:MS Data Takahe iso all:MS Lookup Table	7.875	Bs Mult = L; Ar 40 = L; Ar 39 = L; Ar 38 = L; Ar 37 = L; Ar 36 = L @ ---	Unknown; Automated laser analysis ; 600/340	LLLLLL	1		0	CO2 Laser	28	28	0	0	0	18490	18301
	I	36	0.22064	0.0127259	0.0347749	0.6663	8.30858	14.6716	0.000507834	11.9275	89.2882	5.56278	1.28929	18302	Unknown; Automated laser analysis ; 600/340	NM-126	1.00364	0.0011	1	0		51408-01I	MTK98121	3	2000-07-15	5.03861	3046482000	wcm	San, 85mg	0	MTK		Macintosh HD:Users:mcintosh:Documents: Atlas Wilch 2019: MBL MS Data:Takahe:MS Data Takahe iso all:MS Lookup Table	7.875	Bs Mult = L; Ar 40 = L; Ar 39 = L; Ar 38 = L; Ar 37 = L; Ar 36 = L @ ---	Unknown; Automated laser analysis ; 600/340	LLLLLL	1		0	CO2 Laser	36	36	0	0	0	18490	18302
	J	50	0.181213	0.0133203	0.0286603	0.5447	5.58337	17.8018	0.000678686	12.3559	97.9659	4.73282	1.78995	18308	Unknown; Automated laser analysis ; 600/340	NM-126	1.00364	0.0011	1	0		51408-01J	MTK98121	3	2000-07-15	5.60417	3046484000	wcm	San, 85mg	0	MTK		Macintosh HD:Users:mcintosh:Documents: Atlas Wilch 2019: MBL MS Data:Takahe:MS Data Takahe iso all:MS Lookup Table	7.875	Bs Mult = L; Ar 40 = L; Ar 39 = L; Ar 38 = L; Ar 37 = L; Ar 36 = L @ ---	Unknown; Automated laser analysis ; 600/340	LLLLLL	1		0	CO2 Laser	50	50	0	0	0	18497	18308
Xi	K	50	0.252375	0.0137812	0.0338944	0.2071	1.30879	15.0528	0.000823925	76.7671	100	40.9521	7.12904	18299	Unknown; Automated laser analysis ; 600/340	NM-126	1.00364	0.0011	1	0		51408-01K	MTK98121	3	2000-07-15	8.43694	3046494000	wcm	San, 85mg	0	MTK		Macintosh HD:Users:mcintosh:Documents: Atlas Wilch 2019: MBL MS Data:Takahe:MS Data Takahe iso all:MS Lookup Table	7.875	Bs Mult = L; Ar 40 = L; Ar 39 = L; Ar 38 = L; Ar 37 = L; Ar 36 = L @ ---	Unknown; Automated laser analysis ; 600/340	LLLLLL	1		0	CO2 Laser	50	50	0	0	0	18487	18299
	Integrated age ± 2s				n=10		64.3419	13.7016			K2O=2.48%	4.39645	1.43059			NM-126
	Plateau ± 2s		steps C-J		n=8	MSWD=6.69	61.4986	13.9 ±3.6			95.5809	1.85162	2.71832			NM-126
	Isochron±2s		steps C-J		n=8	MSWD=7.51		40Ar/36Ar=		288.4±10.2		3.81574	1.02513
	MTK98117, San, 139.8mg, J=0.0001172±0.10%, D=1.00364±0.0011, NM-126, Lab#=51409-01, MAP
X	B	5	12.5391	0.0204896	0.0518832	41.6922	2.35205	9.8337	0.000534187	1.77799	2.28898	47.1525	16.5317	39178	Unknown; Automated laser analysis ; 600/675	NM-126	1.00364	0.0011	1	0		51409-01B	MTK98117	3	2000-07-15	23.7825	3046550000	wcm	San, 139.8mg	0	MTK		Macintosh HD:Users:mcintosh:Documents: Atlas Wilch 2019: MBL MS Data:Takahe:MS Data Takahe iso all:MS Lookup Table	7.875	Bs Mult = L; Ar 40 = L; Ar 39 = L; Ar 38 = L; Ar 37 = L; Ar 36 = L @ ---	Unknown; Automated laser analysis ; 600/675	LLLLLL	1		0	CO2 Laser	5	5	0	0	0	39367	39178
X	C	8	1.92463	0.0143583	0.0488194	6.0429	6.78613	10.4508	0.000681818	7.41093	8.89315	30.1668	3.06353	39183	Unknown; Automated laser analysis ; 600/675	NM-126	1.00364	0.0011	1	0		51409-01C	MTK98117	3	2000-07-16	0.756111	3046553000	wcm	San, 139.8mg	0	MTK		Macintosh HD:Users:mcintosh:Documents: Atlas Wilch 2019: MBL MS Data:Takahe:MS Data Takahe iso all:MS Lookup Table	7.875	Bs Mult = L; Ar 40 = L; Ar 39 = L; Ar 38 = L; Ar 37 = L; Ar 36 = L @ ---	Unknown; Automated laser analysis ; 600/675	LLLLLL	1		0	CO2 Laser	8	8	0	0	0	39372	39183
X	D	11	1.16702	0.0135734	0.0400963	3.6387	11.2734	12.7245	0.000588756	8.12008	19.8643	20.0422	2.02789	39179	Unknown; Automated laser analysis ; 600/675	NM-126	1.00364	0.0011	1	0		51409-01D	MTK98117	3	2000-07-16	1.42806	3046556000	wcm	San, 139.8mg	0	MTK		Macintosh HD:Users:mcintosh:Documents: Atlas Wilch 2019: MBL MS Data:Takahe:MS Data Takahe iso all:MS Lookup Table	7.875	Bs Mult = L; Ar 40 = L; Ar 39 = L; Ar 38 = L; Ar 37 = L; Ar 36 = L @ ---	Unknown; Automated laser analysis ; 600/675	LLLLLL	1		0	CO2 Laser	11	11	0	0	0	39367	39179
X	E	14	1.22142	0.0132139	0.0417121	3.7646	13.7682	12.2316	0.000482678	9.1754	33.2633	23.7027	1.80792	39178	Unknown; Automated laser analysis ; 600/675	NM-126	1.00364	0.0011	1	0		51409-01E	MTK98117	3	2000-07-16	2.39722	3046559000	wcm	San, 139.8mg	0	MTK		Macintosh HD:Users:mcintosh:Documents: Atlas Wilch 2019: MBL MS Data:Takahe:MS Data Takahe iso all:MS Lookup Table	7.875	Bs Mult = L; Ar 40 = L; Ar 39 = L; Ar 38 = L; Ar 37 = L; Ar 36 = L @ ---	Unknown; Automated laser analysis ; 600/675	LLLLLL	1		0	CO2 Laser	14	14	0	0	0	39365	39178
X	F	17	0.915122	0.0134415	0.0375523	2.9593	13.2583	13.5865	0.000587361	4.74755	46.166	9.18875	1.7392	39173	Unknown; Automated laser analysis ; 600/675	NM-126	1.00364	0.0011	1	0		51409-01F	MTK98117	3	2000-07-16	3.02611	3046561000	wcm	San, 139.8mg	0	MTK		Macintosh HD:Users:mcintosh:Documents: Atlas Wilch 2019: MBL MS Data:Takahe:MS Data Takahe iso all:MS Lookup Table	7.875	Bs Mult = L; Ar 40 = L; Ar 39 = L; Ar 38 = L; Ar 37 = L; Ar 36 = L @ ---	Unknown; Automated laser analysis ; 600/675	LLLLLL	1		0	CO2 Laser	17	17	0	0	0	39362	39173
	G	20	0.658265	0.0131138	0.0446574	2.1455	10.6794	11.4248	0.000538842	4.19108	56.5591	5.83495	1.72835	39178	Unknown; Automated laser analysis ; 600/675	NM-126	1.00364	0.0011	1	0		51409-01G	MTK98117	3	2000-07-16	4.00222	3046565000	wcm	San, 139.8mg	0	MTK		Macintosh HD:Users:mcintosh:Documents: Atlas Wilch 2019: MBL MS Data:Takahe:MS Data Takahe iso all:MS Lookup Table	7.875	Bs Mult = L; Ar 40 = L; Ar 39 = L; Ar 38 = L; Ar 37 = L; Ar 36 = L @ ---	Unknown; Automated laser analysis ; 600/675	LLLLLL	1		0	CO2 Laser	20	20	0	0	0	39367	39178
	H	28	0.836682	0.0131887	0.0389596	2.8033	13.4232	13.0957	0.000525434	1.33966	69.6223	2.37064	1.56713	39178	Unknown; Automated laser analysis ; 600/675	NM-126	1.00364	0.0011	1	0		51409-01H	MTK98117	3	2000-07-16	4.63972	3046567000	wcm	San, 139.8mg	0	MTK		Macintosh HD:Users:mcintosh:Documents: Atlas Wilch 2019: MBL MS Data:Takahe:MS Data Takahe iso all:MS Lookup Table	7.875	Bs Mult = L; Ar 40 = L; Ar 39 = L; Ar 38 = L; Ar 37 = L; Ar 36 = L @ ---	Unknown; Automated laser analysis ; 600/675	LLLLLL	1		0	CO2 Laser	28	28	0	0	0	39368	39178
	I	36	0.38578	0.0127497	0.0425933	1.3082	15.0691	11.9785	0.00048131	0.61483	84.2873	0.501656	0.934768	39169	Unknown; Automated laser analysis ; 600/675	NM-126	1.00364	0.0011	1	0		51409-01I	MTK98117	3	2000-07-16	5.60722	3046571000	wcm	San, 139.8mg	0	MTK		Macintosh HD:Users:mcintosh:Documents: Atlas Wilch 2019: MBL MS Data:Takahe:MS Data Takahe iso all:MS Lookup Table	7.875	Bs Mult = L; Ar 40 = L; Ar 39 = L; Ar 38 = L; Ar 37 = L; Ar 36 = L @ ---	Unknown; Automated laser analysis ; 600/675	LLLLLL	1		0	CO2 Laser	36	36	0	0	0	39358	39169
	J	50	0.301997	0.0126456	0.0424952	0.9411	12.8445	12.0062	0.000471482	8.9619	96.7873	5.72418	0.902233	39181	Unknown; Automated laser analysis ; 600/675	NM-126	1.00364	0.0011	1	0		51409-01J	MTK98117	3	2000-07-16	6.25583	3046573000	wcm	San, 139.8mg	0	MTK		Macintosh HD:Users:mcintosh:Documents: Atlas Wilch 2019: MBL MS Data:Takahe:MS Data Takahe iso all:MS Lookup Table	7.875	Bs Mult = L; Ar 40 = L; Ar 39 = L; Ar 38 = L; Ar 37 = L; Ar 36 = L @ ---	Unknown; Automated laser analysis ; 600/675	LLLLLL	1		0	CO2 Laser	50	50	0	0	0	39368	39181
X	K	50	0.277655	0.0131161	0.0398224	0.8752	3.30117	12.812	0.000605185	7.92022	100	4.65107	2.8122	39180	Unknown; Automated laser analysis ; 600/675	NM-126	1.00364	0.0011	1	0		51409-01K	MTK98117	3	2000-07-16	7.24778	3046576000	wcm	San, 139.8mg	0	MTK		Macintosh HD:Users:mcintosh:Documents: Atlas Wilch 2019: MBL MS Data:Takahe:MS Data Takahe iso all:MS Lookup Table	7.875	Bs Mult = L; Ar 40 = L; Ar 39 = L; Ar 38 = L; Ar 37 = L; Ar 36 = L @ ---	Unknown; Automated laser analysis ; 600/675	LLLLLL	1		0	CO2 Laser	50	50	0	0	0	39370	39180
	Integrated age ± 2s				n=10		102.755	12.2019			K2O=2.41%	11.46	2.27559			NM-126
	Plateau ± 2s		steps G-J		n=4	MSWD=6.22	52.0161	12.160±1.399			50.6213	3.37887	2.82657			NM-126
	Isochron±2s		steps B-K		n=10	MSWD=16.03		40Ar/36Ar=		311.0±2.9		0.572517	0.100744
	MTK-98083; NM-126 C:5, Bulk san; 146mg, J=0.0001173±0.69%, D=1.00364±0.0011, NM-120, Lab#=51410-01, MAP
Xi	B	5	2.2857	0.0141432	0.38537	5.2695	5.22658	1.32393	0.000667739	32.0867	4.56525	155.235	4.16555	49647	Unknown; Automated laser analysis ; 600/860	NM-120	1.00364	0.0011	1	0		51410-01B	MTK-98083; NM-126 C:5	3	2000-07-16	18.4172	3046617000	wcm	Bulk san; 146mg	0	Takahe		Macintosh HD:Users:mcintosh:Documents: Atlas Wilch 2019: MBL MS Data:Takahe:MS Data Takahe iso all:MS Lookup Table	7.875	Bs Mult = L; Ar 40 = L; Ar 39 = L; Ar 38 = L; Ar 37 = L; Ar 36 = L @ ---	Unknown; Automated laser analysis ; 600/860	LLLLLL	1		0	CO2 Laser	5	5	0	0	0	49836	49647
Xi	C	8	0.685495	0.0124979	0.307218	0.4205	16.4682	1.66072	0.000461734	81.696	18.9497	118.53	1.4115	49655	Unknown; Automated laser analysis ; 600/860	NM-120	1.00364	0.0011	1	0		51410-01C	MTK-98083; NM-126 C:5	3	2000-07-16	19.5611	3046621000	wcm	Bulk san; 146mg	0	Takahe		Macintosh HD:Users:mcintosh:Documents: Atlas Wilch 2019: MBL MS Data:Takahe:MS Data Takahe iso all:MS Lookup Table	7.875	Bs Mult = L; Ar 40 = L; Ar 39 = L; Ar 38 = L; Ar 37 = L; Ar 36 = L @ ---	Unknown; Automated laser analysis ; 600/860	LLLLLL	1		0	CO2 Laser	8	8	0	0	0	49844	49655
	D	11	0.64015	0.0126029	0.33059	0.3356	21.1285	1.54331	0.000495593	84.5976	37.4048	114.623	1.3075	49652	Unknown; Automated laser analysis ; 600/860	NM-120	1.00364	0.0011	1	0		51410-01D	MTK-98083; NM-126 C:5	3	2000-07-16	20.2697	3046623000	wcm	Bulk san; 146mg	0	Takahe		Macintosh HD:Users:mcintosh:Documents: Atlas Wilch 2019: MBL MS Data:Takahe:MS Data Takahe iso all:MS Lookup Table	7.875	Bs Mult = L; Ar 40 = L; Ar 39 = L; Ar 38 = L; Ar 37 = L; Ar 36 = L @ ---	Unknown; Automated laser analysis ; 600/860	LLLLLL	1		0	CO2 Laser	11	11	0	0	0	49842	49652
	E	14	0.694287	0.0127391	0.2854	0.5212	16.9975	1.78768	0.000522998	77.4034	52.2515	113.741	1.36211	49646	Unknown; Automated laser analysis ; 600/860	NM-120	1.00364	0.0011	1	0		51410-01E	MTK-98083; NM-126 C:5	3	2000-07-16	21.3606	3046627000	wcm	Bulk san; 146mg	0	Takahe		Macintosh HD:Users:mcintosh:Documents: Atlas Wilch 2019: MBL MS Data:Takahe:MS Data Takahe iso all:MS Lookup Table	7.875	Bs Mult = L; Ar 40 = L; Ar 39 = L; Ar 38 = L; Ar 37 = L; Ar 36 = L @ ---	Unknown; Automated laser analysis ; 600/860	LLLLLL	1		0	CO2 Laser	14	14	0	0	0	49833	49646
	F	17	0.60995	0.0124174	0.246989	0.2199	12.3579	2.0657	0.000448862	88.3874	63.0458	114.102	1.46529	49739	Unknown; Automated laser analysis ; 600/860	NM-120	1.00364	0.0011	1	0		51410-01F	MTK-98083; NM-126 C:5	3	2000-07-16	22.0611	3046630000	wcm	Bulk san; 146mg	0	Takahe		Macintosh HD:Users:mcintosh:Documents: Atlas Wilch 2019: MBL MS Data:Takahe:MS Data Takahe iso all:MS Lookup Table	7.875	Bs Mult = L; Ar 40 = L; Ar 39 = L; Ar 38 = L; Ar 37 = L; Ar 36 = L @ ---	Unknown; Automated laser analysis ; 600/860	LLLLLL	1		0	CO2 Laser	17	17	0	0	0	49929	49739
	G	20	0.571668	0.0127612	0.247936	0.1432	9.54951	2.05781	0.000548099	91.5923	71.3869	110.818	1.55472	49645	Unknown; Automated laser analysis ; 600/860	NM-120	1.00364	0.0011	1	0		51410-01G	MTK-98083; NM-126 C:5	3	2000-07-16	23.185	3046634000	wcm	Bulk san; 146mg	0	Takahe		Macintosh HD:Users:mcintosh:Documents: Atlas Wilch 2019: MBL MS Data:Takahe:MS Data Takahe iso all:MS Lookup Table	7.875	Bs Mult = L; Ar 40 = L; Ar 39 = L; Ar 38 = L; Ar 37 = L; Ar 36 = L @ ---	Unknown; Automated laser analysis ; 600/860	LLLLLL	1		0	CO2 Laser	20	20	0	0	0	49832	49645
Xi	H	28	0.57333	0.0128156	0.274373	0.1449	11.4467	1.85953	0.000563504	91.8834	81.3852	111.495	1.4646	49637	Unknown; Automated laser analysis ; 600/860	NM-120	1.00364	0.0011	1	0		51410-01H	MTK-98083; NM-126 C:5	3	2000-07-16	23.9569	3046637000	wcm	Bulk san; 146mg	0	Takahe		Macintosh HD:Users:mcintosh:Documents: Atlas Wilch 2019: MBL MS Data:Takahe:MS Data Takahe iso all:MS Lookup Table	7.875	Bs Mult = L; Ar 40 = L; Ar 39 = L; Ar 38 = L; Ar 37 = L; Ar 36 = L @ ---	Unknown; Automated laser analysis ; 600/860	LLLLLL	1		0	CO2 Laser	28	28	0	0	0	49826	49637
Xi	I	36	0.59214	0.012656	0.251948	0.1036	10.2355	2.02504	0.000521068	93.9089	90.3256	117.69	1.60787	49658	Unknown; Automated laser analysis ; 600/860	NM-120	1.00364	0.0011	1	0		51410-01I	MTK-98083; NM-126 C:5	3	2000-07-17	1.05694	3046641000	wcm	Bulk san; 146mg	0	Takahe		Macintosh HD:Users:mcintosh:Documents: Atlas Wilch 2019: MBL MS Data:Takahe:MS Data Takahe iso all:MS Lookup Table	7.875	Bs Mult = L; Ar 40 = L; Ar 39 = L; Ar 38 = L; Ar 37 = L; Ar 36 = L @ ---	Unknown; Automated laser analysis ; 600/860	LLLLLL	1		0	CO2 Laser	36	36	0	0	0	49847	49658
Xi	J	50	0.617926	0.0126746	0.240926	0.0929	8.4971	2.11768	0.000526599	94.5374	97.7476	123.636	1.779	49664	Unknown; Automated laser analysis ; 600/860	NM-120	1.00364	0.0011	1	0		51410-01J	MTK-98083; NM-126 C:5	3	2000-07-17	1.76778	3046643000	wcm	Bulk san; 146mg	0	Takahe		Macintosh HD:Users:mcintosh:Documents: Atlas Wilch 2019: MBL MS Data:Takahe:MS Data Takahe iso all:MS Lookup Table	7.875	Bs Mult = L; Ar 40 = L; Ar 39 = L; Ar 38 = L; Ar 37 = L; Ar 36 = L @ ---	Unknown; Automated laser analysis ; 600/860	LLLLLL	1		0	CO2 Laser	50	50	0	0	0	49852	49664
Xi	K	50	0.638315	0.0127808	0.237821	-0.1446	2.57871	2.14533	0.000568271	105.675	100	142.76	4.63187	49653	Unknown; Automated laser analysis ; 600/860	NM-120	1.00364	0.0011	1	0		51410-01K	MTK-98083; NM-126 C:5	3	2000-07-17	2.90889	3046647000	wcm	Bulk san; 146mg	0	Takahe		Macintosh HD:Users:mcintosh:Documents: Atlas Wilch 2019: MBL MS Data:Takahe:MS Data Takahe iso all:MS Lookup Table	7.875	Bs Mult = L; Ar 40 = L; Ar 39 = L; Ar 38 = L; Ar 37 = L; Ar 36 = L @ ---	Unknown; Automated laser analysis ; 600/860	LLLLLL	1		0	CO2 Laser	50	50	0	0	0	49841	49653
	Integrated age ± 2s				n=10		114.486	1.78589			K2O=2.57%	117.757	2.89858			NM-120
	Plateau ± 2s		steps D-G		n=4	MSWD=1.30	60.0334	1.8 ±0.5			52.4373	113.479	2.21617			NM-120
	Isochron±2s		steps D-G		n=4	MSWD=3.35		40Ar/36Ar=		319.0±32.9		112.451	2.54217
	MTK98086, San, 128mg, J=0.0001173±0.10%, D=1.00364±0.0011, NM-126, Lab#=51411-01, MAP
	B	5	11.1009	0.019363	0.127596	35.877	2.36791	3.99859	0.000524554	4.58487	2.5885	107.71	15.3345	36581	Unknown; Automated laser analysis ; 600/635	NM-126	1.00364	0.0011	1	0		51411-01B	MTK98086	3	2000-07-17	17.6861	3046700000	wcm	San, 128mg	0	MTK		Macintosh HD:Users:mcintosh:Documents: Atlas Wilch 2019: MBL MS Data:Takahe:MS Data Takahe iso all:MS Lookup Table	7.875	Bs Mult = L; Ar 40 = L; Ar 39 = L; Ar 38 = L; Ar 37 = L; Ar 36 = L @ ---	Unknown; Automated laser analysis ; 600/635	LLLLLL	1		0	CO2 Laser	5	5	0	0	0	36769	36581
	C	8	2.42741	0.0141825	0.112199	6.1468	7.55163	4.54732	0.000628767	25.524	10.8436	131.115	3.39364	36584	Unknown; Automated laser analysis ; 600/635	NM-126	1.00364	0.0011	1	0		51411-01C	MTK98086	3	2000-07-17	18.6369	3046704000	wcm	San, 128mg	0	MTK		Macintosh HD:Users:mcintosh:Documents: Atlas Wilch 2019: MBL MS Data:Takahe:MS Data Takahe iso all:MS Lookup Table	7.875	Bs Mult = L; Ar 40 = L; Ar 39 = L; Ar 38 = L; Ar 37 = L; Ar 36 = L @ ---	Unknown; Automated laser analysis ; 600/635	LLLLLL	1		0	CO2 Laser	8	8	0	0	0	36772	36584
	D	11	1.42684	0.01323	0.0941411	2.6436	12.4229	5.41957	0.000546029	45.7515	24.4239	138.145	1.8877	36602	Unknown; Automated laser analysis ; 600/635	NM-126	1.00364	0.0011	1	0		51411-01D	MTK98086	3	2000-07-17	19.2972	3046706000	wcm	San, 128mg	0	MTK		Macintosh HD:Users:mcintosh:Documents: Atlas Wilch 2019: MBL MS Data:Takahe:MS Data Takahe iso all:MS Lookup Table	7.875	Bs Mult = L; Ar 40 = L; Ar 39 = L; Ar 38 = L; Ar 37 = L; Ar 36 = L @ ---	Unknown; Automated laser analysis ; 600/635	LLLLLL	1		0	CO2 Laser	11	11	0	0	0	36789	36602
	E	14	2.78116	0.0139595	0.0778031	7.2139	13.6887	6.55763	0.000511175	23.5633	39.3878	138.679	3.01525	36584	Unknown; Automated laser analysis ; 600/635	NM-126	1.00364	0.0011	1	0		51411-01E	MTK98086	3	2000-07-17	20.2458	3046710000	wcm	San, 128mg	0	MTK		Macintosh HD:Users:mcintosh:Documents: Atlas Wilch 2019: MBL MS Data:Takahe:MS Data Takahe iso all:MS Lookup Table	7.875	Bs Mult = L; Ar 40 = L; Ar 39 = L; Ar 38 = L; Ar 37 = L; Ar 36 = L @ ---	Unknown; Automated laser analysis ; 600/635	LLLLLL	1		0	CO2 Laser	14	14	0	0	0	36772	36584
	F	17	2.02192	0.0136164	0.0790116	4.6197	11.2046	6.45733	0.000550492	32.7796	51.6362	140.255	2.20967	36593	Unknown; Automated laser analysis ; 600/635	NM-126	1.00364	0.0011	1	0		51411-01F	MTK98086	3	2000-07-17	20.8564	3046712000	wcm	San, 128mg	0	MTK		Macintosh HD:Users:mcintosh:Documents: Atlas Wilch 2019: MBL MS Data:Takahe:MS Data Takahe iso all:MS Lookup Table	7.875	Bs Mult = L; Ar 40 = L; Ar 39 = L; Ar 38 = L; Ar 37 = L; Ar 36 = L @ ---	Unknown; Automated laser analysis ; 600/635	LLLLLL	1		0	CO2 Laser	17	17	0	0	0	36782	36593
	G	20	2.58961	0.0137499	0.0621093	6.5845	9.5284	8.21462	0.000485453	25.0446	62.0523	137.244	2.80438	36589	Unknown; Automated laser analysis ; 600/635	NM-126	1.00364	0.0011	1	0		51411-01G	MTK98086	3	2000-07-17	21.8064	3046715000	wcm	San, 128mg	0	MTK		Macintosh HD:Users:mcintosh:Documents: Atlas Wilch 2019: MBL MS Data:Takahe:MS Data Takahe iso all:MS Lookup Table	7.875	Bs Mult = L; Ar 40 = L; Ar 39 = L; Ar 38 = L; Ar 37 = L; Ar 36 = L @ ---	Unknown; Automated laser analysis ; 600/635	LLLLLL	1		0	CO2 Laser	20	20	0	0	0	36777	36589
Xi	H	28	1.69339	0.0130158	0.0513639	3.2479	12.2402	9.93312	0.000454714	43.5498	75.4328	156.057	1.93056	36588	Unknown; Automated laser analysis ; 600/635	NM-126	1.00364	0.0011	1	0		51411-01H	MTK98086	3	2000-07-17	22.4553	3046718000	wcm	San, 128mg	0	MTK		Macintosh HD:Users:mcintosh:Documents: Atlas Wilch 2019: MBL MS Data:Takahe:MS Data Takahe iso all:MS Lookup Table	7.875	Bs Mult = L; Ar 40 = L; Ar 39 = L; Ar 38 = L; Ar 37 = L; Ar 36 = L @ ---	Unknown; Automated laser analysis ; 600/635	LLLLLL	1		0	CO2 Laser	28	28	0	0	0	36776	36588
Xi	I	36	1.10883	0.0128687	0.0499571	1.4745	12.5868	10.2128	0.00050578	61.0426	89.1921	143.231	1.30276	36595	Unknown; Automated laser analysis ; 600/635	NM-126	1.00364	0.0011	1	0		51411-01I	MTK98086	3	2000-07-17	23.4344	3046721000	wcm	San, 128mg	0	MTK		Macintosh HD:Users:mcintosh:Documents: Atlas Wilch 2019: MBL MS Data:Takahe:MS Data Takahe iso all:MS Lookup Table	7.875	Bs Mult = L; Ar 40 = L; Ar 39 = L; Ar 38 = L; Ar 37 = L; Ar 36 = L @ ---	Unknown; Automated laser analysis ; 600/635	LLLLLL	1		0	CO2 Laser	36	36	0	0	0	36784	36595
Xi	J	50	1.04442	0.0131391	0.065575	1.4349	7.82251	7.78047	0.000582984	59.8756	97.7434	132.334	1.7916	36592	Unknown; Automated laser analysis ; 600/635	NM-126	1.00364	0.0011	1	0		51411-01J	MTK98086	3	2000-07-18	0.0691667	3046723000	wcm	San, 128mg	0	MTK		Macintosh HD:Users:mcintosh:Documents: Atlas Wilch 2019: MBL MS Data:Takahe:MS Data Takahe iso all:MS Lookup Table	7.875	Bs Mult = L; Ar 40 = L; Ar 39 = L; Ar 38 = L; Ar 37 = L; Ar 36 = L @ ---	Unknown; Automated laser analysis ; 600/635	LLLLLL	1		0	CO2 Laser	50	50	0	0	0	36781	36592
Xi	K	50	1.19737	0.0137518	0.0531604	1.6638	2.06431	9.59744	0.000740656	59.2743	100	150.187	5.64861	36593	Unknown; Automated laser analysis ; 600/635	NM-126	1.00364	0.0011	1	0		51411-01K	MTK98086	3	2000-07-18	1.03833	3046727000	wcm	San, 128mg	0	MTK		Macintosh HD:Users:mcintosh:Documents: Atlas Wilch 2019: MBL MS Data:Takahe:MS Data Takahe iso all:MS Lookup Table	7.875	Bs Mult = L; Ar 40 = L; Ar 39 = L; Ar 38 = L; Ar 37 = L; Ar 36 = L @ ---	Unknown; Automated laser analysis ; 600/635	LLLLLL	1		0	CO2 Laser	50	50	0	0	0	36780	36593
	Integrated age ± 2s				n=10		91.478	6.92389			K2O=2.34%	139.879	3.33258			NM-126
	Plateau ± 2s		steps B-G		n=6	MSWD=1.82	56.7642	6.2 ±3.1			62.0523	137.698	3.00578			NM-126
	Isochron±2s		steps B-G		n=6	MSWD=1.38		40Ar/36Ar=		292.0±3.7		141.3	4.39095
	Notes:
	Isotopic ratios corrected for blank, radioactive decay, and mass discrimination, not corrected for interfering reactions.
	Errors quoted for individual analyses include analytical error only, without interfering reaction or J uncertainties.
	Integrated age calculated by summing isotopic measurements of all steps.																					--- Atmospheric argon ratios and discrimination ---
	Integrated age error calculated by quadratically combining errors of isotopic measurements of all steps.																					(40Ar/36Ar)atm	295.5 ± 0.5
	Plateau age is inverse-variance-weighted mean of selected steps.																					(40Ar/38Ar)atm	1575 ± 2
	Plateau age error is inverse-variance-weighted mean error (Taylor, 1982) times root MSWD where MSWD>1.																					Source of spectrometer discrimination value and error	Data file
	Plateau error is weighted error of Taylor (1982).
	Decay constants and isotopic abundances after Steiger and Jäger (1977).																					Source of spectrometer sensitivity value and error	Saved with run
	# symbol preceding sample ID denotes analyses excluded from plateau age calculations.
	Weight percent K2O calculated from 39Ar signal, sample weight, and instrument sensitivity.																					--- Source of J and use of J Adjustment Table ---
	Ages calculated relative to FC-2 Fish Canyon Tuff sanidine interlaboratory standard at 28.201 Ma (Kuiper et al., 2008)																					Use J saved with run	FALSE
	Decay Constant (LambdaK (total)) = 5.543e-10/a																					J adjustment table useage	Use as J
	Correction factors:																					--- Minor irradiation parameters (see also Irradiation Data File) ---
	(39Ar/37Ar)Ca = 0.0007 ± 0.000050																					(38Ar/37Ar)Ca	0.00014 ± 0
	(36Ar/37Ar)Ca = 0.00026 ± 0.0000200																					(38Ar/39Ar)K	0.01077 ± 0
	(38Ar/39Ar)K = 0.01077																					P(36Cl/38Cl)	320 ± 0
	(40Ar/39Ar)K = 0.0002 ± 0.0003
																						--- Decay constants ---
																						Lambda 40K epsilon	5.810000e-11 ± 5.810000e-11
																						Lambda 40K Beta	4.962000e-10 ± 4.962000e-10
																						Lambda 37Ar	0.01975 ± 0
																						Lambda 39Ar	7.068000e-6 ± 5.463000e-10
																						Lambda 36Cl	6.308000e-9 ± 0
																						--- Calculation options ---
																						Normalize gain	FALSE
																						Use volume fraction delivered to ms to normalize gain	FALSE
																						Always calculate without ratios	TRUE
																						Calc. %40Ar* as %40*/(40*+40Atm)	FALSE
																						Number of trials in Monte Carlo sim.	1
																						37Ar/39Ar calculation	Normal
																						H35Cl Correction	FALSE
																						--- Isotope curve fitting ---
																						Parabolic vs. Linear probability cutoff	0.05
																						Error envelope as 1 or 2 sigma	1
																						Delete outliers within cycles before fit	FALSE
																						Average cycles before fit	FALSE
																						Delete outliers after fit	FALSE
																						Number of iterations of deleting outliers after fit	1
																						Cutoff for detecting outliers, sigma	2
																						Method of centroid location is	mean
																						--- Files ---
																						Irradiation data file	Macintosh HD:Users:mcintosh:KAr:Aux.Data:Irradiation Data pre and post database
																						J Adjustment table	Macintosh HD:Users:mcintosh:KAr:Aux.Data:J Adjustment Table Takahe
																						Run data file #1	Macintosh HD:Users:mcintosh:Documents: Atlas Wilch 2019: MBL MS Data:Takahe:MS Data Takahe iso all:MS Lookup Table
																						Run data file #2	Macintosh HD:Users:mcintosh:Documents: Atlas Wilch 2019: MBL MS Data:Takahe: Takahe NM-126:MS Data Takahe NM-126:MS Lookup Table
[truncated: 133 more columns]

## Sheet: MTK98-055
z
